# Supplementary material
Source: publisher figshare collection journal article supplement (https://tandf.figshare.com/ndownloader/files/40507813)
Supplement: Supplementary file 1 [file 40507813]

**Supplementary Table 1** Origin of *Plasmodiophora brassicae* field isolates collected in Alberta, Canada, in 2019 and 2020, from galls of clubroot resistant canola plants. Each isolate represents a different field.

| **Year Collected** | **Population** | **Hosta** | **Originb** | **Pathotypec** |
| --- | --- | --- | --- | --- |
|  |
| 2019 | S-1-19 | L234PC* | Sturgeon | 3D |  |
|  | S-2-19 | L234PC* | Edmonton | 8E |  |
|  | S-3-19 | 6076CR* | Sturgeon | 3H |  |
|  | S-4-19 | CS2600CR-T* | Sturgeon | 3H |  |
|  | S-5-19 | L241C | Sturgeon | 3A |  |
|  | S-6-19 | L241C | Sturgeon | 3A |  |
|  | S-7-19 | 75-42CR | Sturgeon | 3A |  |
|  | S-8-19 | 45CM39* | Westlock | 8G |  |
|  | S-9-19 | L241C | Westlock | 3A |  |
|  | S-10-19 | L135C | Sturgeon | 3A |  |
|  | S-11-19 | L135C | Sturgeon | 3A |  |
|  | S-12-19 | L135C | Sturgeon | 3A |  |
|  | S-13-19 | L135C | Sturgeon | 3A |  |
|  | S-14-19 | Victory V14-1 | Sturgeon | 3A |  |
|  | S-15-19 | L135C | Sturgeon | 3A |  |
|  | S-16-19 | L241C | Sturgeon | 3A |  |
|  | S-17-19 | Nexera 1026RR | Sturgeon | 3A |  |
|  | S-18-19 | 45CS40 | Sturgeon | 3A |  |
|  | S-19-19 | Nexera 1026RR | Sturgeon | 3A |  |
|  | S-20-19 | Nexera 1026RR | Sturgeon | 3A |  |
|  | S-21-19 | L241C | Westlock | 5X |  |
|  | S-22-19 | L241C | Westlock | 5X |  |
|  | S-23-19 | Nexera 1026RR | Sturgeon | 3A |  |
|  | S-24-19 | Nexera 1026RR | Westlock | 3A |  |
|  | S-25-19 | L241C | Westlock | 3A |  |
|  | C.C.-1-19 | CS2000 | Red Deer | 9E |  |
|  | C.C.-2-19 | DKTF-94CR | Wetaskiwin | 8E |  |
|  | C.C.-3-19 | DKTF-94CR | Wetaskiwin | 8E |  |
|  | C.C.-4-19 | DKTF-94CR | Wetaskiwin | 8E |  |
|  | C.C.-5-19 | L135C | Wetaskiwin | 3A |  |
|  | C.C.-6-19 | DKTF-94CR | Wetaskiwin | 3D |  |
|  | C.C.-7-19 | DKTF-94CR | Wetaskiwin | 3D |  |
|  | C.C.-8-19 | Non-specified resistant | Red Deer | 9E |  |
|  | C.C.-9-19 | Non-specified susceptible | Mountain View | 8N |  |
|  | C.C.-10-19 | Non-specified susceptible | Rocky View | 3H |  |
|  | F.P.-64-19 | L234PC* | Starland | 9D |  |
|  | Camrose c.-1-19 | CS2000* | Camrose | 3D |  |
|  | Camrose c.-2-19 | CS2000* | Camrose | 8N |  |
|  | Camrose c.-3-19 | L241C | Camrose | 3A |  |
|  | Camrose c.-4-19 | L241C | Camrose | 8E |  |
|  | Camrose c.-5-19 | DKTF-94CR | Camrose | 3A |  |
|  | Camrose c.-6-19 | CS2000* | Camrose | 8E |  |
|  | Camrose c.-7-19 | L241C | Camrose | 3D |  |
|  | Camrose c.-8-19 | CS2000* | Camrose | 8E |  |
|  | Camrose c.-9-19 | 75-42CR | Camrose | 8P |  |
|  | Camrose c.-10-19 | DKTF-94CR | Camrose | 3D |  |
|  | Camrose c.-11-19 | L241C | Camrose | 3D |  |
|  | Camrose c.-12-19 | PV585GC* | Camrose | 3D |  |
|  | Lacomb.c.-1-19 | L241C | Lacombe | 8E |  |
|  | Lacomb.c.-2-19 | L241C | Lacombe | 9F |  |
|  | Lacomb.c.-3-19 | L241C | Lacombe | 9E |  |
|  | Lacomb.c.-4-19 | L241C | Lacombe | 9B |  |
|  | Bonvl.c.-1-19 | 45H29 | Bonnyville | 3H |  |
|  | Leduc c.-1-19 | L241C | Leduc | 8C |  |
|  | Leduc c.-2-19 | L241C | Leduc | 3A |  |
|  | Leduc c.-3-19 | L135C | Leduc | 3D |  |
|  | Leduc c.-4-19 | 75-42CR | Leduc | 8E |  |
|  | Leduc c.-5-19 | L135C | Leduc | 3D |  |
|  | Leduc c.-6-19 | 45H29 | Leduc | 3A |  |
|  | Leduc c.-7-19 | 75-42CR | Leduc | 3D |  |
|  | Leduc c.-8-19 | 45H29 | Leduc | 3C |  |
|  | Leduc c.-9-19 | L135C | Leduc | 3D |  |
|  | Leduc c.-10-19 | L135C | Leduc | 3A |  |
|  | Leduc c.-11-19 | L241C | Leduc | 3D |  |
|  | Leduc c.-12-19 | L241C | Leduc | 3H |  |
|  | Leduc c.-13-19 | 45H29 | Leduc | 3A |  |
|  | Leduc c.-14-19 | DKTF-94CR | Leduc | 8E |  |
|  | Leduc c.-15-19 | 45CS40 | Leduc | 3D |  |
|  | Leduc c.-16-19 | L135C | Leduc | 8J |  |
|  | Leduc c.-17-19 | 45H29 | Leduc | 3D |  |
|  | Leduc c.-18-19 | 45H29 | Leduc | 3D |  |
|  | Leduc c.-19-19 | L241C | Leduc | 3O |  |
|  | Leduc c.-20-19 | 75-42CR | Leduc | 3D |  |
|  | Leduc c.-21-19 | 75-42CR | Leduc | 3D |  |
|  | Leduc c.-22-19 | L135C | Leduc | 3D |  |
|  | Leduc c.-23-19 | 45H29 | Leduc | 3D |  |
|  | Leduc c.-24-19 | 45H29 | Leduc | 3A |  |
|  | Leduc c.-25-19 | 45CS40 | Leduc | 3A |  |
|  | Leduc c.-26-19 | L241C | Leduc | 3A |  |
|  | Leduc c.-27-19 | L135C | Leduc | 3D |  |
|  | B.L. c.-1-19 | L234PC* | Big Lakes | 13A |  |
|  | B.L. c.-2-19 | L234PC* | Big Lakes | 3H |  |
|  | B.L. c.-3-19 | L234PC* | Big Lakes | 3A |  |
|  | B.L. c.-4-19 | L234PC* | Big Lakes | 5G |  |
|  | Greenview c.-1-19 | 45H29 | Greenview | 8A |  |
|  | Greenview c.-2-19 | L241C | Greenview | 3H |  |
|  | Greenview c.-3-19 | L241C | Greenview | 3H |  |
|  | Greenview c.-4-19 | L135C | Greenview | 3H |  |
|  | Greenview c.-5-19 | CS2000* | Greenview | 8D |  |
|  | Greenview c.-6-19 | 45H29 | Greenview | 3H |  |
|  | Greenview c.-7-19 | 45H29 | Greenview | 3H |  |
|  | Greenview c.-9-19 | L135C | Greenview | 8D |  |
|  | Greenview c.-11-19 | L135C | Greenview | 3H |  |
|  | Greenview c.-12-19 | L135C | Greenview | 3H |  |
|  | Greenview c.-13-19 | CS2000* | Greenview | 3H |  |
|  | Greenview c.-14-19 | 45H29 | Greenview | 3H |  |
|  | Greenview c.-15-19 | L241C | Greenview | 3B |  |
|  | St.Paul c.-1-19 | PV581GC | St. Paul | 3H |  |
|  | St.Paul c.-2-19 | PV581GC | St. Paul | 8N |  |
|  | St.Paul c.-3-19 | 75-42CR | St. Paul | 3H |  |
|  | St.Paul c.-4-19 | 45H33 | St. Paul | 3H |  |
|  | St.Paul c.-5-19 | CS2600CR-T* | St. Paul | 3H |  |
|  | St.Paul c.-6-19 | 75-42CR | St. Paul | 3H |  |
|  | Lamont c.-1-19 | L234PC* | Lamont | 5L |  |
|  | Lamont c.-2-19 | DKTF-94CR | Lamont | 3D |  |
|  | Lamont c.-3-19 | DKTF-94CR | Lamont | 8N |  |
|  | Lamont c.-4-19 | 75-42CR | Lamont | 3D |  |
|  | Lamont c.-5-19 | D3155C | Lamont | 8E |  |
|  | Lamont c.-6-19 | L135C | Lamont | 3H |  |
|  | Lamont c.-7-19 | 45H33 | Lamont | 3H |  |
|  | T.hills c.-1-19 | 45H29 | Two Hills | 3H |  |
|  | T.hills c.-2-19 | DKTF-94CR | Two Hills | 3D |  |
|  | T.hills c.-3-19 | DKTF-94CR | Two Hills | 3D |  |
|  | T.hills c.-4-19 | DKTF-94CR | Two Hills | 3D |  |
|  | V.river c.-1-19 | L255PC | Vermilion River | 8N |  |
|  | V.river c.-2-19 | 45CM39* | Vermilion River | 8N |  |
|  | Pioneer-1-19 | 45H33 | Leduc | 8D |  |
|  | Pioneer-2-19 | 45CM36 | Leduc | 3D |  |
|  | Ponoka c.-1-19 | DKTF-94CR) | Ponoka | 8P |  |
|  | R.deer c.-1-19 | CS2000* | Red Deer | 9E |  |
|  | R.deer c.-2-19 | 45H33 | Red Deer | 9E |  |
|  | R.deer c.-3-19 | L241C | Red Deer | 9E |  |
|  | R.deer c.-4-19 | 45H33 | Red Deer | 9E |  |
|  | Kneehill-1-19 | L135C | Kneehill | 3H |  |
|  | Rocky.V c.-1-19 | 45CS40 | Rocky View | 5L |  |
|  | Fisher-3-19 | L135C | Leduc | 3A |  |
| 2020 | Rocky.V c.-1-20 | L233P (susceptible) | Rocky View | 5L |  |
|  | Rocky.V c.-2-20 | L233P (susceptible) | Rocky View | 5L |  |
|  | Strathcona c.-1-20 | Dekalb 75-42CR | Strathcona | 3A |  |
|  | Mount.V c.-1-20 | 45H29 | Mountain View | 3H |  |
|  | Wheatland c.-1-20 | Dekalb 75-65 (susceptible) | Wheatland | 5L |  |
|  | Wainwright c.-1-20 | 6090 RR BrettYoung | Wainwright | 8I |  |
|  | R.deer c.-1-20 | L345PC | Red Deer | 5G |  |
|  | R.deer c.-2-20 | Dekalb 75-42CR | Red Deer | 9E |  |
|  | R.deer c.-3-20 | L241C | Red Deer | 8J |  |
|  | Birch.H c.-1-20 | Susceptible variety | Birch Hills | 8A |  |
|  | Birch.H c.-2-20 | Susceptible variety | Birch Hills | 8A |  |
|  | Birch.H c.-3-20 | Susceptible variety | Birch Hills | 8A |  |
|  | Smoky.R c.-1-20 | Susceptible variety | Smoky River | 8N |  |
|  | Smoky.R c.-2-20 | Susceptible variety | Smoky River | 8N |  |
|  | Smoky.R c.-3-20 | 45H37RR | Smoky River | 8E |  |
|  | Athabasca c.-1-20 | Dekalb75-45RR (susceptible) | Athabasca | 8N |  |
|  | Athabasca c.-2-20 | Dekalb75-45RR (susceptible) | Athabasca | 8N |  |
|  | Sturgeon c.-1-20 | CS2600 CR-T* | Sturgeon/Legal | 3D |  |
|  | Sturgeon c.-2-20 | B3010M* | Sturgeon/Legal | 8C |  |
|  | ABtaC.-3-20 | 45CM39* | Beaver/Holden | 8N |  |
|  | Bayer-2-20 | Westar (susceptible) | Edmonton | 5L |  |
|  | G.Prairie c.-1-20 | DKTFLL 21SC (susceptible) | Grande Prairie | 8N |  |
|  | Greenview c.-1-20 | Unknown | Greenview | 8A |  |
|  | Greenview c.-2-20 | Unknown | Greenview | 3H |  |
|  | Greenview c.-3-20 | Unknown | Greenview | 3H |  |
|  | Leduc c.-1-20 | L255PC | Leduc | 3D |  |
|  | Leduc c.-2-20 | L241C | Leduc | 5C |  |
|  | Leduc c.-3-20 | 75-42CR | Leduc | 8E |  |
|  | Leduc c.-4-20 | L135C | Leduc | 8E |  |
|  | Leduc c.-5-20 | L255PC | Leduc | 3D |  |
|  | Leduc c.-6-20 | L241C | Leduc | 3D |  |
|  | Leduc c.-7-20 | 45H29 | Leduc | 5C |  |
|  | Leduc c.-8-20 | 75-42CR | Leduc | 8E |  |
|  | Leduc c.-9-20 | D3155C | Leduc | 8P |  |
|  | Leduc c.-10-20 | L241C | Leduc | 8J |  |
|  | Leduc c.-11-20 | 75-42CR | Leduc | 8P |  |
|  | Leduc c.-12-20 | L135C | Leduc | 8E |  |
|  | Leduc c.-13-20 | L255PC | Leduc | 3D |  |
|  | Leduc c.-14-20 | L241C | Leduc | 8E |  |
|  | Leduc c.-15-20 | 75-42CR | Leduc | 8E |  |
|  | Leduc c.-16-20 | 45H29 | Leduc | 8E |  |
|  | Leduc c.-17-20 | L255PC | Leduc | 3D |  |
|  | Leduc c.-18-20 | L241C | Leduc | 3D |  |
|  | Leduc c.-19-20 | D3155C | Leduc | 3D |  |
|  | Leduc c.-20-20 | L255PC | Leduc | 8N |  |
|  | Leduc c.-21-20 | 75-42CR | Leduc | 8E |  |
|  | Leduc c.-22-20 | L135C | Leduc | 8E |  |
|  | Leduc c.-23-20 | L241C | Leduc | 5C |  |
|  | Leduc c.-24-20 | 75-42CR | Leduc/Edmonton | 3D |  |
|  | Leduc c.-25-20 | 45H29 | Leduc/Edmonton | 3D |  |
|  | Leduc c.-26-20 | D3155C | Leduc/Edmonton | 3D |  |
|  | Leduc c.-27-20 | L255PC | Leduc Edmonton | 8E |  |
|  | S-1-20 | L241C | Sturgeon | 3D |  |
|  | S-2-20 | 45H29 | Sturgeon | 3A |  |
|  | S-3-20 | L241C | Sturgeon | 3A |  |
|  | S-4-20 | L241C | Sturgeon | 3A |  |
|  | S-5-20 | L241C | Sturgeon | 3A |  |
|  | S-6-20 | B3010M* | Sturgeon | 3D |  |
|  | S-7-20 | L241C | Sturgeon | 8P |  |
|  | S-8-20 | L255PC | Sturgeon | 3A |  |
|  | S-9-20 | L255PC | Sturgeon | 3D |  |
|  | S-10-20 | Nexera 1026RR | Sturgeon | 3A |  |
|  | S-11-20 | L255PC | Westlock | 8E |  |
|  | S-12-20 | L241C | Westlock | 8P |  |
|  | S-13-20 | L234PC* | Westlock | 3H |  |
|  | S-14-20 | L241C | Westlock | 3A |  |
|  | S-15-20 | L241C | Westlock | 3D |  |
|  | S-16-20 | L241C | Westlock | 5G |  |
|  | S-17-20 | Nexera 1028RR | Westlock | 3A |  |
|  | S-18-20 | L241C | Westlock | 3A |  |
|  | S-19-20 | L258HPC | Westlock | 8E |  |
|  | S-20-20 | L241C | Westlock | 8E |  |
|  | S-21-20 | L241C | Westlock | 8E |  |
|  | St.Paul-1-20 | L241C | St. Paul | 5L |  |
|  | St.Paul-2-20 | 6076CR* | St. Paul | 8A |  |
|  | St.Paul-3-20 | L241C | St. Paul | 3H |  |
|  | St.Paul-4-20 | P501L | St. Paul | 8N |  |
|  | St.Paul-5-20 | P501L | St. Paul | 8N |  |
|  | St.Paul-6-20 | L241C | St. Paul | 3H |  |
|  | St.Paul-7-20 | B3010M* | St. Paul | 8D |  |
|  | St.Paul-8-20 | 75-42CR | St. Paul | 3H |  |
|  | St.Paul-9-20 | 75-42CR | St. Paul | 8D |  |
|  | St.Paul-10-20 | 75-42CR | St. Paul | 8A |  |
|  | St.Paul-11-20 | L241C | St. Paul | 8N |  |
|  | V.river c.-1-20 | 45H29 | Vermilion River | 3H |  |
|  | V.river c.-2-20 | 45H29 | Vermilion River | 8D |  |
|  | T.hills c.-1-20 | L241C | Two Hills | 8A |  |
|  | Lamont c.-1-20 | L241C | Lamont | 5L |  |
|  | Lamont c.-2-20 | 45H29 | Lamont | 3A |  |
|  | Lamont c.-3-20 | L241C | Lamont | 8N |  |
|  | Lamont c.-4-20 | L345PC | Lamont | 3A |  |
|  | Lamont c.-5-20 | 75-42CR | Lamont | 8D |  |
|  | Lamont c.-6-20 | D3155C | Lamont | 3H |  |
|  | L.S.Anne c.-1-20 | L241C | Lac Ste. Anne | 3A |  |
|  | L.S.Anne c.-2-20 | L135C | Lac Ste. Anne | 3D |  |
|  | L.S.Anne c.-3-20 | 45H29 | Lac Ste. Anne | 3H |  |
|  | L.S.Anne c.-4-20 | L241C | Lac Ste. Anne | 3H |  |
|  | L.S.Anne c.-5-20 | L241C | Lac Ste. Anne | 8P |  |
|  | L.S.Anne c.-6-20 | 75-42CR | Lac Ste. Anne | 3H |  |
|  | L.S. c.Anne-7-20 | 45H29 | Lac Ste. Anne | 3A |  |
|  | L.S. c.Anne-8-20 | L241C | Lac Ste. Anne | 8N |  |
|  | D-1-20 | Non-specified resistant | Parkland | 3A |  |
|  | D-2-20 | Non-specified resistant | Wetaskiwin | 8P |  |
|  | C.C.-1-20 | 45H29 | Red Deer | 5G |  |
|  | C.C.-2-20 | L241C | Red Deer | 9E |  |
|  | C.C.-3-20 | L345C | Red Deer | 5G |  |
|  | C.C.-4-20 | L241C | City of Red Deer | 9E |  |
|  | C.C.-5-20 | L241C | City of Red Deer | 9E |  |
|  | C.C.-6-20 | 75-42CR | Ponoka | 8E |  |
|  | C.C.-7-20 | PV584* | Ponoka | 8E |  |
|  | B.L. c.-1-20 | Non-specified resistant | Big Lakes | 3H |  |
|  | B.L. c.-2-20 | Non-specified resistant | Big Lakes | 3H |  |
|  | B.L. c.-3-20 | Non-specified resistant | Big Lakes | 3H |  |

aThe hosts represent the canola cultivars from which each *P. brassicae* isolate was obtained; unless listed as ‘susceptible’, all were considered resistant to isolates of the pathogen collected prior to 2013. Cultivars denoted by an asterisk (*) carry “second-generation” clubroot resistance; the nature of this resistance is not in the public domain, but is presumably distinct from the first-generation resistance derived from the winter oilseed rape ‘Mendel.’

bNames listed refer to counties or municipal districts, with the exceptions of the City of Red Deer and the City of Edmonton (listed as Edmonton).

cPathotype designations are based on the Canadian Clubroot Differential set.

| **Year Collected** | **Population** | **Hosta** | **Originb** | **Pathotypec** |
| --- | --- | --- | --- | --- |
|  |
| 2019 | AN-2019-01 | N/A | SK | 8N |  |
|  | Rep-01-19 | N/A | SK | 8N |  |
|  | Rep-02-19 | N/A | SK | 8A |  |
|  | F-128-19 | N/A | SK | 8A |  |
|  | F-152-19 | N/A | SK | 8N |  |
|  | F-170-19 | N/A | SK | 8N |  |
|  | MB-1-19 | N/A | MB | 2C |  |
| 2020 | SK-1-20 | N/A | SK | 5L |  |
|  | SK-2-20 | N/A | SK | 3H |  |
|  | SK-3-20 | N/A | SK | 3H |  |
|  | SK-4-20 | N/A | SK | 3H |  |
|  | SK-5-20 | N/A | SK | 3H |  |
|  | SK-6-20 | N/A | SK | 8A |  |
|  | SK-7-20 | N/A | SK | 8N |  |
|  | SK-8-20 | N/A | SK | 8N |  |
|  | SK-9-20 | N/A | SK | 8N |  |
|  | SK-10-20 | N/A | SK | 3H |  |
|  | SK-11-20 | N/A | SK | 3H |  |
|  | SK-12-20 | N/A | SK | 3H |  |
|  | SK-13-20 | PV761RR | SK | 8N |  |
|  | MB-3-20 | N/A | MB | 5L |  |

**Supplementary Table 2** Origin of *Plasmodiophora brassicae* field isolates collected in Manitoba and Saskatchewan, Canada, in 2019 and 2020, from galls found on canola roots. Each isolate represents a different field.

aN/A, not available; the canola cultivars from which each *P. brassicae* isolate was obtained were either not known or not provided with the samples.

bSK, Saskatchewan; MB, Manitoba.

cPathotype designations are based on the Canadian Clubroot Differential set.

**Supplementary Table 3** Reaction of Brassica host differential genotypes to inoculation with *Plasmodiophora brassicae* field isolates collected from the Canadian Prairies, in 2019 and 2020.

| **Host Genotypea,b** | | | | | | | | | | | | | |
| --- | --- | --- | --- | --- | --- | --- | --- | --- | --- | --- | --- | --- | --- |
| **Isolate** | ECD 02 | ECD 05 | ECD 06 | ECD 08 | ECD 09 | ECD 10 | ECD 11 | ECD 13 | Brutor | Laur. | Mendel | Westar | 45H29 |
| **2019** |  |  |  |  |  |  |  |  |  |  |  |  |  |
|  |  |  |  |  |  |  |  |  |  |  |  |  |  |
| S-1-19 | 0.0 | 100.0 | 56.8 | 100.0 | 53.5 | 24.5 | 11.8 | 54.1 | 100.0 | 93.1 | 10.1 | 93.4 | 94.3 |
|  |  | ±0.0 | ±3.44 | ±0.0 | ±1.40 | ±1.81 | ±5.43 | ±2.34 | ±0.0 | ±2.96 | ±3.48 | ±2.59 | ±2.13 |
| S-2-19 | 0.0 | 100.0 | 61.6 | 100.0 | 65.7 | 23.4 | 19.8 | 48.9 | 100.0 | 100.0 | 7.8 | 100.0 | 82.3 |
|  |  | ±0.0 | ±6.94 | ±0.0 | ±8.25 | ±5.77 | ±2.78 | ±2.58 | ±0.0 | ±0.0 | ±6.76 | ±0.0 | ±6.42 |
| S-3-19 | 0.0 | 100.0 | 51.8 | 100.0 | 56.3 | 12.1 | 29.9 | 52.1 | 100.0 | 100.0 | 2.1 | 100.0 | 14.4 |
|  |  | ±0.0 | ±1.29 | ±0.0 | ±1.59 | ±2.10 | ±7.16 | ±1.36 | ±0.0 | ±0.0 | ±4.08 | ±0.0 | ±8.11 |
| S-4-19 | 0.0 | 100.0 | 77.3 | 100.0 | 83.2 | 11.2 | 22.7 | 56.6 | 100.0 | 100.0 | 1.5 | 100.0 | 8.9 |
|  |  | ±0.0 | ±4.34 | ±0.0 | ±5.69 | ±2.09 | ±4.55 | ±4.59 | ±0.0 | ±0.0 | ±2.97 | ±0.0 | ±6.71 |
| S-5-19 | 1.4 | 100.0 | 73.0 | 100.0 | 100.0 | 12.5 | 25.4 | 90.0 | 100.0 | 100.0 | 84.6 | 100.0 | 100.0 |
|  | ±2.72 | ±0.0 | ±2.57 | ±0.0 | ±0.0 | ±3.91 | ±3.77 | ±4.01 | ±0.0 | ±0.0 | ±3.58 | ±0.0 | ±0.0 |
| S-6-19 | 1.5 | 100.0 | 70.3 | 100.0 | 100.0 | 21.0 | 10.6 | 90.2 | 100.0 | 100.0 | 79.4 | 100.0 | 100.0 |
|  | ±2.97 | ±0.0 | ±6.10 | ±0.0 | ±0.0 | ±1.31 | ±5.28 | ±3.23 | ±0.0 | ±0.0 | ±3.42 | ±0.0 | ±0.0 |
| S-7-19 | 0.0 | 100.0 | 81.8 | 100.0 | 100.0 | 43.1 | 8.2 | 94.1 | 100.0 | 100.0 | 97.2 | 100.0 | 100.0 |
|  |  | ±0.0 | ±8.74 | ±0.0 | ±0.0 | ±4.71 | ±4.08 | ±2.53 | ±0.0 | ±0.0 | ±2.23 | ±0.0 | ±0.0 |
| S-8-19 | 0.0 | 90.3 | 22.5 | 88.3 | 11.3 | 10.9 | 0.0 | 34.7 | 88.3 | 57.6 | 9.2 | 18.5 | 52.8 |
|  |  | ±2.36 | ±12.09 | ±3.33 | ±2.11 | ±3.60 |  | ±6.48 | ±3.33 | ±2.24 | ±2.39 | ±11.54 | ±2.22 |
| S-9-19 | 0.0 | 96.3 | 64.4 | 98.5 | 71.9 | 3.0 | 0.0 | 86.6 | 96.0 | 97.0 | 61.1 | 98.5 | 98.5 |
|  |  | ±1.25 | ±2.84 | ±1.65 | ±3.56 | ±2.24 |  | ±3.55 | ±1.79 | ±2.43 | ±2.22 | ±1.65 | ±1.65 |
| S-10-19 | 1.4 | 100.0 | 79.5 | 100.0 | 100.0 | 21.3 | 14.9 | 94.2 | 100.0 | 100.0 | 93.5 | 100.0 | 100.0 |
|  | ±2.72 | ±0.0 | ±3.72 | ±0.0 | ±0.0 | ±3.40 | ±3.79 | ±2.01 | ±0.0 | ±0.0 | ±2.33 | ±0.0 | ±0.0 |
| S-11-19 | 1.5 | 100.0 | 82.4 | 100.0 | 100.0 | 15.1 | 4.5 | 83.6 | 100.0 | 100.0 | 87.7 | 100.0 | 100.0 |
|  | ±2.97 | ±0.0 | ±3.61 | ±0.0 | ±0.0 | ±3.59 | ±1.87 | ±3.60 | ±0.0 | ±0.0 | ±5.89 | ±0.0 | ±0.0 |
| S-12-19 | 5.2 | 100.0 | 73.9 | 100.0 | 100.0 | 26.1 | 11.5 | 92.0 | 100.0 | 100.0 | 93.3 | 100.0 | 100.0 |
|  | ±4.21 | ±0.0 | ±6.17 | ±0.0 | ±0.0 | ±3.91 | ±6.24 | ±3.24 | ±0.0 | ±0.0 | ±2.54 | ±0.0 | ±0.0 |
| S-13-19 | 0.0 | 100.0 | 74.3 | 100.0 | 94.8 | 23.9 | 5.4 | 81.2 | 100.0 | 100.0 | 90.3 | 100.0 | 100.0 |
|  |  | ±0.0 | ±6.80 | ±0.0 | ±2.45 | ±2.84 | ±1.42 | ±7.15 | ±0.0 | ±0.0 | ±3.80 | ±0.0 | ±0.0 |
| S-14-19 | 6.6 | 100.0 | 75.3 | 100.0 | 100.0 | 25.6 | 15.1 | 83.3 | 100.0 | 100.0 | 98.5 | 100.0 | 100.0 |
|  | ±4.75 | ±0.0 | ±2.64 | ±0.0 | ±0.0 | ±2.49 | ±3.54 | ±3.30 | ±0.0 | ±0.0 | ±1.65 | ±0.0 | ±0.0 |
| S-15-19 | 5.0 | 100.0 | 72.2 | 100.0 | 87.3 | 19.4 | 9.6 | 94.1 | 100.0 | 93.5 | 79.3 | 100.0 | 100.0 |
|  | ±4.68 | ±0.0 | ±6.67 | ±0.0 | ±5.58 | ±4.04 | ±4.54 | ±3.22 | ±0.0 | ±3.87 | ±9.48 | ±0.0 | ±0.0 |
| S-16-19 | 0.0 | 100.0 | 68.3 | 100.0 | 97.2 | 11.5 | 5.7 | 85.1 | 100.0 | 100.0 | 70.5 | 100.0 | 100.0 |
|  |  | ±0.0 | ±7.31 | ±0.0 | ±2.23 | ±3.64 | ±2.13 | ±1.29 | ±0.0 | ±0.0 | ±2.90 | ±0.0 | ±0.0 |
| S-17-19 | 0.0 | 100.0 | 61.7 | 100.0 | 97.9 | 11.9 | 5.8 | 79.4 | 100.0 | 100.0 | 97.2 | 100.0 | 100.0 |
|  |  | ±0.0 | ±2.66 | ±0.0 | ±2.61 | ±4.43 | ±2.01 | ±2.60 | ±0.0 | ±0.0 | ±2.23 | ±0.0 | ±0.0 |
| S-18-19 | 2.1 | 100.0 | 78.8 | 100.0 | 100.0 | 11.6 | 5.8 | 83.6 | 100.0 | 100.0 | 98.5 | 100.0 | 100.0 |
|  | ±4.08 | ±0.0 | ±6.20 | ±0.0 | ±0.0 | ±1.96 | ±2.01 | ±3.60 | ±0.0 | ±0.0 | ±1.65 | ±0.0 | ±0.0 |
| S-19-19 | 0.0 | 100.0 | 72.5 | 100.0 | 100.0 | 19.2 | 5.1 | 66.0 | 100.0 | 100.0 | 61.8 | 100.0 | 100.0 |
|  |  | ±0.0 | ±7.18 | ±0.0 | ±0.0 | ±3.64 | ±2.40 | ±2.78 | ±0.0 | ±0.0 | ±4.08 | ±0.0 | ±0.0 |
| S-20-19 | 7.5 | 100.0 | 71.7 | 100.0 | 100.0 | 41.7 | 14.5 | 78.2 | 100.0 | 100.0 | 94.0 | 100.0 | 100.0 |
|  | ±2.02 | ±0.0 | ±5.45 | ±0.0 | ±0.0 | ±3.73 | ±5.40 | ±4.26 | ±0.0 | ±0.0 | ±2.82 | ±0.0 | ±0.0 |
| S-21-19 | 14.6 | 100.0 | 4.4 | 100.0 | 2.3 | 0.0 | 0.0 | 34.8 | 100.0 | 42.3 | 79.4 | 100.0 | 100.0 |
|  | ±7.05 | ±0.0 | ±4.94 | ±0.0 | ±2.87 |  |  | ±5.35 | ±0.0 | ±4.22 | ±7.07 | ±0.0 | ±0.0 |
| S-22-19 | 4.9 | 100.0 | 2.1 | 100.0 | 1.4 | 0.0 | 0.0 | 30.3 | 100.0 | 16.7 | 80.6 | 100.0 | 100.0 |
|  | ±5.61 | ±0.0 | ±2.63 | ±0.0 | ±2.72 |  |  | ±5.29 | ±0.0 | ±5.24 | ±6.83 | ±0.0 | ±0.0 |
| S-23-19 | 0.0 | 100.0 | 70.3 | 100.0 | 100.0 | 12.9 | 8.2 | 81.9 | 100.0 | 100.0 | 80.3 | 100.0 | 100.0 |
|  |  | ±0.0 | ±2.74 | ±0.0 | ±0.0 | ±3.11 | ±3.74 | ±2.67 | ±0.0 | ±0.0 | ±4.97 | ±0.0 | ±0.0 |
| S-24-19 | 0.8 | 100.0 | 75.1 | 100.0 | 97.9 | 22.5 | 18.4 | 68.8 | 100.0 | 100.0 | 97.9 | 100.0 | 100.0 |
|  | ±1.63 | ±0.0 | ±2.03 | ±0.0 | ±2.61 | ±3.65 | ±1.29 | ±2.63 | ±0.0 | ±0.0 | ±2.63 | ±0.0 | ±0.0 |
| S-25-19 | 2.3 | 100.0 | 88.6 | 100.0 | 100.0 | 14.0 | 8.8 | 66.9 | 100.0 | 100.0 | 92.2 | 100.0 | 100.0 |
|  | ±4.45 | ±0.0 | ±2.28 | ±0.0 | ±0.0 | ±3.29 | ±1.81 | ±4.42 | ±0.0 | ±0.0 | ±4.50 | ±0.0 | ±0.0 |
| C.C.-1-19 | 2.8 | 100.0 | 94.3 | 27.1 | 26.1 | 72.9 | 0.0 | 48.7 | 100.0 | 100.0 | 75.6 | 100.0 | 100.0 |
|  | ±3.85 | ±0.0 | ±4.04 | ±6.91 | ±6.17 | ±7.82 |  | ±5.92 | ±0.0 | ±0.0 | ±3.58 | ±0.0 | ±0.0 |
| C.C.-2-19 | 0.0 | 100.0 | 51.8 | 100.0 | 80.7 | 11.0 | 8.6 | 48.0 | 100.0 | 97.2 | 9.8 | 100.0 | 97.9 |
|  |  | ±0.0 | ±2.19 | ±0.0 | ±6.84 | ±2.04 | ±2.04 | ±4.72 | ±0.0 | ±3.85 | ±3.33 | ±0.0 | ±2.61 |
| C.C.-3-19 | 0.0 | 100.0 | 51.8 | 100.0 | 51.8 | 19.8 | 0.0 | 37.6 | 100.0 | 96.3 | 13.2 | 100.0 | 97.9 |
|  |  | ±0.0 | ±2.19 | ±0.0 | ±2.19 | ±5.24 |  | ±5.52 | ±0.0 | ±2.70 | ±2.61 | ±0.0 | ±2.61 |
| C.C.-4-19 | 0.0 | 100.0 | 71.6 | 100.0 | 81.5 | 10.8 | 10.2 | 50.1 | 100.0 | 92.0 | 41.3 | 100.0 | 100.0 |
|  |  | ±0.0 | ±4.61 | ±0.0 | ±6.49 | ±2.23 | ±1.72 | ±2.73 | ±0.0 | ±3.24 | ±8.34 | ±0.0 | ±0.0 |
| C.C.-5-19 | 0.0 | 100.0 | 53.2 | 100.0 | 65.3 | 14.6 | 17.4 | 52.0 | 100.0 | 100.0 | 52.6 | 100.0 | 100.0 |
|  |  | ±0.0 | ±1.67 | ±0.0 | ±4.98 | ±3.10 | ±0.86 | ±0.89 | ±0.0 | ±0.0 | ±0.75 | ±0.0 | ±0.0 |
| C.C.-6-19 | 0.0 | 100.0 | 64.2 | 100.0 | 53.9 | 15.8 | 7.9 | 56.6 | 100.0 | 100.0 | 7.0 | 100.0 | 100.0 |
|  |  | ±0.0 | ±5.46 | ±0.0 | ±1.99 | ±2.99 | ±2.35 | ±2.50 | ±0.0 | ±0.0 | ±3.42 | ±0.0 | ±0.0 |
| C.C.-7-19 | 0.0 | 100.0 | 61.0 | 100.0 | 75.3 | 16.3 | 7.3 | 64.6 | 94.8 | 90.7 | 7.1 | 100.0 | 100.0 |
|  |  | ±0.0 | ±2.12 | ±0.0 | ±2.64 | ±0.74 | ±1.68 | ±4.65 | ±2.45 | ±5.50 | ±1.44 | ±0.0 | ±0.0 |
| C.C.-8-19 | 0.0 | 100.0 | 94.4 | 37.5 | 4.4 | 97.9 | 0.0 | 15.3 | 100.0 | 100.0 | 96.5 | 100.0 | 100.0 |
|  |  | ±0.0 | ±4.97 | ±1.57 | ±4.94 | ±2.61 |  | ±4.71 | ±0.0 | ±0.0 | ±4.08 | ±0.0 | ±0.0 |
| C.C.-9-19 | 0.0 | 100.0 | 68.4 | 100.0 | 69.4 | 19.6 | 12.2 | 43.2 | 100.0 | 100.0 | 0.0 | 100.0 | 10.5 |
|  |  | ±0.0 | ±7.53 | ±0.0 | ±5.06 | ±2.54 | ±2.22 | ±4.58 | ±0.0 | ±0.0 |  | ±0.0 | ±10.45 |
| C.C.-10-19 | 0.0 | 100.0 | 75.5 | 100.0 | 81.5 | 20.3 | 16.1 | 51.8 | 100.0 | 95.8 | 8.5 | 100.0 | 18.4 |
|  |  | ±0.0 | ±4.96 | ±0.0 | ±5.87 | ±3.44 | ±2.53 | ±1.29 | ±0.0 | ±3.48 | ±6.68 | ±0.0 | ±18.4 |
| F.P.-64-19/ Starl.c.-1-19 | 2.1 | 100.0 | 100.0 | 80.9 | 70.8 | 63.1 | 6.4 | 44.6 | 100.0 | 100.0 | 64.2 | 100.0 | 100.0 |
|  | ±4.08 | ±0.0 | ±0.0 | ±3.90 | ±5.21 | ±2.59 | ±2.46 | ±5.74 | ±0.0 | ±0.0 | ±3.11 | ±0.0 | ±0.0 |
| Camrose c.-1-19 | 0.0 | 100.0 | 69.1 | 100.0 | 77.3 | 7.8 | 11.6 | 54.3 | 100.0 | 93.2 | 9.0 | 100.0 | 100.0 |
|  |  | ±0.0 | ±8.72 | ±0.0 | ±4.34 | ±1.53 | ±1.96 | ±1.43 | ±0.0 | ±2.64 | ±1.78 | ±0.0 | ±0.0 |
| Camrose c.-2-19 | 0.0 | 100.0 | 55.6 | 100.0 | 80.6 | 14.8 | 3.7 | 34.7 | 100.0 | 92.5 | 2.1 | 100.0 | 11.0 |
|  |  | ±0.0 | ±3.70 | ±0.0 | ±5.58 | ±1.45 | ±2.72 | ±6.85 | ±0.0 | ±3.64 | ±4.08 | ±0.0 | ±3.75 |
| Camrose c.-3-19 | 2.8 | 100.0 | 54.2 | 100.0 | 92.2 | 12.5 | 0.0 | 54.2 | 100.0 | 100.0 | 54.9 | 100.0 | 100.0 |
|  | ±3.85 | ±0.0 | ±1.57 | ±0.0 | ±1.53 | ±3.51 |  | ±1.57 | ±0.0 | ±0.0 | ±1.36 | ±0.0 | ±0.0 |
| Camrose c.-4-19 | 0.0 | 100.0 | 71.1 | 100.0 | 83.0 | 6.1 | 4.5 | 31.9 | 100.0 | 91.4 | 13.5 | 100.0 | 100.0 |
|  |  | ±0.0 | ±5.17 | ±0.0 | ±5.27 | ±2.47 | ±1.50 | ±5.67 | ±0.0 | ±2.04 | ±1.67 | ±0.0 | ±0.0 |
| Camrose c.-5-19 | 1.5 | 100.0 | 74.3 | 100.0 | 82.6 | 9.2 | 5.7 | 65.3 | 100.0 | 97.9 | 63.8 | 100.0 | 100.0 |
|  | ±1.65 | ±0.0 | ±6.43 | ±0.0 | ±7.32 | ±2.57 | ±2.13 | ±2.72 | ±0.0 | ±2.61 | ±4.09 | ±0.0 | ±0.0 |
| Camrose c.-6-19 | 0.0 | 94.2 | 53.3 | 91.8 | 51.8 | 29.9 | 2.8 | 35.5 | 96.3 | 79.9 | 7.4 | 97.1 | 97.2 |
|  |  | ±2.01 | ±1.45 | ±1.88 | ±1.29 | ±4.08 | ±2.23 | ±6.81 | ±2.72 | ±8.03 | ±5.66 | ±2.24 | ±2.23 |
| Camrose c.-7-19 | 0.0 | 100.0 | 63.9 | 100.0 | 96.4 | 5.1 | 0.0 | 60.0 | 100.0 | 100.0 | 41.6 | 100.0 | 100.0 |
|  |  | ±0.0 | ±8.01 | ±0.0 | ±4.17 | ±1.19 |  | ±4.34 | ±0.0 | ±0.0 | ±2.28 | ±0.0 | ±0.0 |
| Camrose c.-8-19 | 0.0 | 100.0 | 54.7 | 100.0 | 80.2 | 8.8 | 1.5 | 50.3 | 100.0 | 77.1 | 16.3 | 100.0 | 94.9 |
|  |  | ±0.0 | ±2.29 | ±0.0 | ±1.67 | ±5.25 | ±1.65 | ±2.83 | ±0.0 | ±3.11 | ±5.93 | ±0.0 | ±3.54 |
| Camrose c.-9-19 | 0.0 | 100.0 | 80.9 | 100.0 | 93.6 | 9.9 | 7.1 | 44.4 | 100.0 | 100.0 | 61.8 | 100.0 | 100.0 |
|  |  | ±0.0 | ±4.49 | ±0.0 | ±3.95 | ±3.44 | ±1.44 | ±3.70 | ±0.0 | ±0.0 | ±2.61 | ±0.0 | ±0.0 |
| Camrose c.-10-19 | 0.0 | 100.0 | 57.9 | 100.0 | 87.7 | 7.4 | 7.3 | 68.8 | 100.0 | 100.0 | 38.5 | 100.0 | 100.0 |
|  |  | ±0.0 | ±3.49 | ±0.0 | ±4.13 | ±3.35 | ±6.59 | ±7.16 | ±0.0 | ±0.0 | ±1.51 | ±0.0 | ±0.0 |
| Camrose c.-11-19 | 0.0 | 100.0 | 62.9 | 100.0 | 91.2 | 15.8 | 6.4 | 67.4 | 100.0 | 90.7 | 42.4 | 100.0 | 100.0 |
|  |  | ±0.0 | ±3.74 | ±0.0 | ±2.04 | ±2.99 | ±3.32 | ±2.67 | ±0.0 | ±3.23 | ±7.50 | ±0.0 | ±0.0 |
| Camrose c.-12-19 | 0.0 | 100.0 | 52.1 | 100.0 | 81.6 | 18.4 | 6.5 | 50.0 | 100.0 | 78.3 | 10.2 | 100.0 | 100.0 |
|  |  | ±0.0 | ±1.36 | ±0.0 | ±2.57 | ±2.57 | ±3.22 | ±2.22 | ±0.0 | ±3.34 | ±4.35 | ±0.0 | ±0.0 |
| Lacomb.c.-1-19 | 0.0 | 100.0 | 56.0 | 100.0 | 61.7 | 10.2 | 3.7 | 36.8 | 100.0 | 76.5 | 8.2 | 100.0 | 90.2 |
|  |  | ±0.0 | ±1.60 | ±0.0 | ±4.61 | ±3.09 | ±2.70 | ±6.04 | ±0.0 | ±11.4 | ±2.28 | ±0.0 | ±5.57 |
| Lacomb.c.-2-19 | 0.0 | 90.6 | 26.6 | 87.9 | 26.1 | 87.9 | 0.0 | 20.8 | 89.1 | 73.8 | 17.7 | 88.2 | 60.4 |
|  |  | ±2.69 | ±3.84 | ±3.40 | ±3.82 | ±3.40 |  | ±3.51 | ±2.55 | ±3.63 | ±1.32 | ±1.62 | ±3.43 |
| Lacomb.c.-3-19 | 0.7 | 100.0 | 88.6 | 27.6 | 8.9 | 100.0 | 0.0 | 22.0 | 100.0 | 100.0 | 73.2 | 100.0 | 100.0 |
|  |  | ±0.0 | ±5.23 | ±6.01 | ±0.78 | ±0.0 |  | ±3.88 | ±0.0 | ±0.0 | ±7.60 | ±0.0 | ±0.0 |
| Lacomb.c.-4-19 | 1.5 | 100.0 | 100.0 | 65.3 | 39.0 | 100.0 | 0.0 | 41.9 | 100.0 | 100.0 | 96.5 | 100.0 | 100.0 |
|  |  | ±0.0 | ±0.0 | ±2.89 | ±4.88 | ±0.0 |  | ±5.89 | ±0.0 | ±0.0 | ±1.32 | ±0.0 | ±0.0 |
| Bonvl.c.-1-19 | 0.0 | 100.0 | 68.2 | 100.0 | 73.0 | 20.7 | 17.7 | 55.1 | 100.0 | 100.0 | 2.1 | 100.0 | 10.5 |
|  |  | ±0.0 | ±3.74 | ±0.0 | ±5.92 | ±2.93 | ±3.41 | ±3.34 | ±0.0 | ±0.0 | ±4.08 | ±0.0 | ±4.48 |
| Leduc c.-1-19 | 0.0 | 100.0 | 43.5 | 92.0 | 55.5 | 4.4 | 0.0 | 24.2 | 100.0 | 59.5 | 26.9 | 100.0 | 100.0 |
|  |  | ±0.0 | ±5.28 | ±3.24 | ±3.07 | ±3.52 |  | ±7.27 | ±0.0 | ±1.29 | ±4.77 | ±0.0 | ±0.0 |
| Leduc c.-2-19 | 3.7 | 100.0 | 69.6 | 100.0 | 92.0 | 13.3 | 9.0 | 68.8 | 100.0 | 100.0 | 57.2 | 100.0 | 100.0 |
|  | ±2.72 | ±0.0 | ±10.47 | ±0.0 | ±2.93 | ±0.82 | ±1.78 | ±7.83 | ±0.0 | ±0.0 | ±1.77 | ±0.0 | ±0.0 |
| Leduc c.-3-19 | 0.0 | 100.0 | 67.4 | 100.0 | 100.0 | 22.9 | 18.4 | 69.7 | 100.0 | 100.0 | 31.8 | 100.0 | 100.0 |
|  |  | ±0.0 | ±4.41 | ±0.0 | ±0.0 | ±5.50 | ±1.29 | ±3.98 | ±0.0 | ±0.0 | ±1.74 | ±0.0 | ±0.0 |
| Leduc c.-4-19 | 0.0 | 100.0 | 54.9 | 88.7 | 58.5 | 17.0 | 5.9 | 43.8 | 97.7 | 81.6 | 5.7 | 91.0 | 91.8 |
|  |  | ±0.0 | ±1.36 | ±2.62 | ±2.81 | ±2.83 | ±1.87 | ±5.93 | ±1.51 | ±4.55 | ±2.13 | ±4.75 | ±1.88 |
| Leduc c.-5-19 | 0.0 | 100.0 | 56.9 | 100.0 | 67.4 | 18.9 | 6.5 | 68.1 | 100.0 | 85.8 | 33.4 | 100.0 | 100.0 |
|  |  | ±0.0 | ±2.36 | ±0.0 | ±4.69 | ±1.89 | ±2.33 | ±1.65 | ±0.0 | ±3.75 | ±8.74 | ±0.0 | ±0.0 |
| Leduc c.-6-19 | 0.0 | 100.0 | 73.2 | 100.0 | 90.1 | 10.2 | 9.1 | 70.6 | 100.0 | 100.0 | 57.3 | 100.0 | 100.0 |
|  |  | ±0.0 | ±1.67 | ±0.0 | ±3.43 | ±3.00 | ±3.89 | ±4.17 | ±0.0 | ±0.0 | ±2.69 | ±0.0 | ±0.0 |
| Leduc c.-7-19 | 0.0 | 92.4 | 51.8 | 85.8 | 52.3 | 17.7 | 4.4 | 52.1 | 91.2 | 83.4 | 7.5 | 90.1 | 92.3 |
|  |  | ±3.28 | ±1.29 | ±3.75 | ±0.90 | ±3.01 | ±1.59 | ±1.36 | ±1.81 | ±2.24 | ±1.38 | ±1.60 | ±2.16 |
| Leduc c.-8-19 | 0.0 | 91.8 | 42.0 | 75.3 | 45.3 | 12.2 | 8.7 | 52.6 | 90.1 | 83.4 | 23.6 | 91.9 | 95.1 |
|  |  | ±1.88 | ±8.01 | ±7.17 | ±3.89 | ±2.22 | ±3.86 | ±1.41 | ±1.61 | ±2.24 | ±5.21 | ±1.41 | ±2.54 |
| Leduc c.-9-19 | 1.5 | 100.0 | 58.0 | 100.0 | 86.4 | 12.2 | 11.0 | 60.9 | 100.0 | 100.0 | 22.0 | 100.0 | 100.0 |
|  | ±2.97 | ±0.0 | ±2.04 | ±0.0 | ±3.83 | ±4.40 | ±4.06 | ±3.30 | ±0.0 | ±0.0 | ±1.93 | ±0.0 | ±0.0 |
| Leduc c.-10-19 | 0.0 | 100.0 | 70.2 | 100.0 | 91.0 | 14.5 | 12.2 | 81.6 | 100.0 | 100.0 | 52.1 | 100.0 | 100.0 |
|  |  | ±0.0 | ±4.64 | ±0.0 | ±6.81 | ±1.89 | ±3.67 | ±5.14 | ±0.0 | ±0.0 | ±1.36 | ±0.0 | ±0.0 |
| Leduc c.-11-19 | 0.0 | 100.0 | 60.9 | 100.0 | 87.1 | 15.4 | 10.4 | 60.7 | 100.0 | 86.5 | 24.6 | 100.0 | 100.0 |
|  |  | ±0.0 | ±2.53 | ±0.0 | ±6.54 | ±4.22 | ±3.14 | ±2.32 | ±0.0 | ±4.51 | ±3.32 | ±0.0 | ±0.0 |
| Leduc c.-12-19 | 0.0 | 100.0 | 54.6 | 100.0 | 95.5 | 5.3 | 10.8 | 66.7 | 100.0 | 84.7 | 2.5 | 100.0 | 8.4 |
|  |  | ±0.0 | ±1.56 | ±0.0 | ±1.50 | ±1.68 | ±5.43 | ±4.14 | ±0.0 | ±3.89 | ±4.90 | ±0.0 | ±1.65 |
| Leduc c.-13-19 | 0.0 | 100.0 | 57.0 | 100.0 | 77.0 | 12.4 | 4.4 | 56.3 | 100.0 | 100.0 | 53.6 | 100.0 | 100.0 |
|  |  | ±0.0 | ±1.76 | ±0.0 | ±5.62 | ±3.45 | ±3.52 | ±2.61 | ±0.0 | ±0.0 | ±1.77 | ±0.0 | ±0.0 |
| Leduc c.-14-19 | 0.0 | 95.6 | 66.2 | 94.1 | 91.1 | 11.2 | 5.9 | 28.9 | 96.3 | 85.2 | 45.8 | 94.7 | 95.5 |
|  |  | ±1.66 | ±7.83 | ±3.14 | ±2.15 | 3.8 | ±3.67 | ±6.07 | ±2.70 | ±4.33 | ±6.85 | ±1.57 | ±1.87 |
| Leduc c.-15-19 | 0.0 | 100.0 | 61.7 | 100.0 | 82.7 | 4.4 | 4.9 | 52.2 | 100.0 | 84.2 | 41.0 | 100.0 | 100.0 |
|  |  | ±0.0 | ±2.48 | ±0.0 | ±4.70 | ±3.55 | ±2.54 | ±1.47 | ±0.0 | ±4.55 | ±6.04 | ±0.0 | ±0.0 |
| Leduc c.-16-19 | 0.0 | 92.2 | 31.7 | 89.4 | 17.4 | 0.0 | 0.0 | 18.1 | 91.4 | 82.4 | 6.3 | 93.6 | 87.8 |
|  |  | ±2.49 | ±5.47 | ±3.02 | ±1.82 |  |  | ±7.68 | ±2.04 | ±4.22 | ±3.34 | ±2.46 | ±2.95 |
| Leduc c.-17-19 | 0.0 | 100.0 | 56.8 | 100.0 | 80.9 | 9.0 | 5.3 | 55.3 | 100.0 | 84.3 | 18.8 | 100.0 | 100.0 |
|  |  | ±0.0 | ±1.39 | ±0.0 | ±2.31 | ±3.01 | ±1.57 | ±2.28 | ±0.0 | ±3.05 | ±6.04 | ±0.0 | ±0.0 |
| Leduc c.-18-19 | 0.0 | 100.0 | 59.6 | 89.2 | 56.4 | 8.9 | 4.5 | 61.7 | 100.0 | 84.0 | 19.1 | 100.0 | 100.0 |
|  |  | ±0.0 | ±1.44 | ±2.23 | ±2.14 | ±3.67 | ±1.50 | ±2.54 | ±0.0 | ±1.82 | ±2.31 | ±0.0 | ±0.0 |
| Leduc c.-19-19 | 0.0 | 93.6 | 35.4 | 78.1 | 54.6 | 3.7 | 0.0 | 53.2 | 92.7 | 58.1 | 9.4 | 100.0 | 100.0 |
|  |  | 2.8 | ±4.08 | ±4.66 | ±2.57 | ±2.72 |  | ±0.87 | ±1.68 | ±3.62 | ±1.17 | ±0.0 | ±0.0 |
| Leduc c.-20-19 | 0.0 | 91.1 | 54.6 | 91.1 | 70.9 | 6.0 | 4.4 | 53.3 | 91.8 | 92.5 | 49.6 | 92.5 | 91.8 |
|  |  | ±2.45 | ±1.28 | ±2.15 | ±4.69 | ±2.32 | ±3.55 | ±1.45 | ±1.88 | ±1.38 | ±2.34 | ±3.42 | ±3.66 |
| Leduc c.-21-19 | 0.0 | 100.0 | 66.0 | 100.0 | 80.6 | 9.0 | 4.5 | 54.6 | 100.0 | 80.5 | 22.7 | 100.0 | 100.0 |
|  |  | ±0.0 | ±2.91 | ±0.0 | ±4.83 | ±4.77 | ±1.50 | ±1.28 | ±0.0 | ±4.39 | ±3.97 | ±0.0 | ±0.0 |
| Leduc c.-22-19 | 0.0 | 100.0 | 53.3 | 100.0 | 89.4 | 8.8 | 5.2 | 53.2 | 100.0 | 92.5 | 15.3 | 100.0 | 100.0 |
|  |  | ±0.0 | ±1.65 | ±0.0 | ±2.43 | ±2.04 | ±2.45 | ±1.67 | ±0.0 | ±1.38 | ±5.43 | ±0.0 | ±0.0 |
| Leduc c.-23-19 | 0.0 | 100.0 | 55.7 | 100.0 | 92.0 | 11.2 | 8.5 | 66.9 | 100.0 | 100.0 | 46.8 | 100.0 | 100.0 |
|  |  | ±0.0 | ±1.75 | ±0.0 | ±2.21 | ±3.91 | ±2.25 | ±6.94 | ±0.0 | ±0.0 | ±2.93 | ±0.0 | ±0.0 |
| Leduc c.-24-19 | 0.0 | 100.0 | 67.4 | 100.0 | 93.4 | 14.9 | 18.4 | 79.6 | 100.0 | 90.8 | 72.7 | 100.0 | 100.0 |
|  |  | ±0.0 | ±6.11 | ±0.0 | ±2.67 | ±2.57 | ±1.29 | ±1.70 | ±0.0 | ±2.68 | ±8.52 | ±0.0 | ±0.0 |
| Leduc c.-25-19 | 0.0 | 100.0 | 71.0 | 100.0 | 100.0 | 16.4 | 9.5 | 77.2 | 100.0 | 100.0 | 57.3 | 100.0 | 100.0 |
|  |  | ±0.0 | ±3.55 | ±0.0 | ±0.0 | ±4.37 | ±3.04 | ±4.48 | ±0.0 | ±0.0 | ±2.69 | ±0.0 | ±0.0 |
| Leduc c.-26-19 | 0.0 | 97.7 | 77.2 | 95.6 | 94.0 | 19.1 | 6.0 | 67.4 | 95.4 | 87.5 | 65.4 | 94.3 | 97.8 |
|  |  | ±1.51 | ±2.53 | ±3.55 | ±2.57 | ±2.31 | ±2.32 | ±1.48 | ±1.71 | ±2.87 | ±5.87 | ±2.24 | ±2.82 |
| Leduc c.-27-19 | 0.0 | 100.0 | 69.4 | 100.0 | 95.5 | 10.9 | 6.0 | 60.8 | 100.0 | 100.0 | 39.4 | 100.0 | 100.0 |
|  |  | ±0.0 | ±6.87 | ±0.0 | ±3.74 | ±1.25 | ±2.17 | ±5.30 | ±0.0 | ±0.0 | ±7.27 | ±0.0 | ±0.0 |
| B.L. c.-1-19 | 0.0 | 92.7 | 22.1 | 61.8 | 22.5 | 14.6 | 6.6 | 55.7 | 93.3 | 64.5 | 10.6 | 92.6 | 25.4 |
|  |  | ±1.68 | ±3.62 | ±4.65 | ±4.27 | ±4.20 | ±3.31 | ±1.75 | ±1.18 | ±2.63 | ±3.97 | ±1.57 | ±9.02 |
| B.L. c.-2-19 | 0.0 | 100.0 | 61.4 | 100.0 | 84.8 | 12.2 | 5.2 | 56.7 | 100.0 | 92.7 | 6.6 | 100.0 | 14.8 |
|  |  | ±0.0 | ±3.57 | ±0.0 | ±4.29 | ±2.22 | ±2.45 | ±1.90 | ±0.0 | ±1.68 | ±4.34 | ±0.0 | ±3.13 |
| B.L. c.-3-19 | 0.8 | 100.0 | 79.4 | 100.0 | 92.9 | 11.3 | 15.6 | 81.3 | 100.0 | 100.0 | 64.6 | 100.0 | 100.0 |
|  |  | ±0.0 | ±4.51 | ±0.0 | ±1.81 | ±1.93 | ±3.41 | ±4.08 | ±0.0 | ±0.0 | ±2.61 | ±0.0 | ±0.0 |
| B.L. c.-4-19 | 0.0 | 100.0 | 13.9 | 100.0 | 12.9 | 0.0 | 0.0 | 24.7 | 100.0 | 22.6 | 6.9 | 100.0 | 51.8 |
|  |  | ±0.0 | ±4.97 | ±0.0 | ±5.64 |  |  | ±2.64 | ±0.0 | ±6.29 | ±4.53 | ±0.0 | ±1.29 |
| Greenview c.-1-19 | 0.0 | 91.5 | 37.8 | 91.9 | 26.1 | 7.2 | 0.0 | 29.9 | 90.8 | 88.7 | 11.1 | 91.2 | 4.4 |
|  |  | ±2.25 | ±10.16 | ±4.20 | ±6.17 | ±3.24 |  | ±9.26 | ±5.86 | ±2.62 | ±4.22 | ±2.65 | ±4.94 |
| Greenview c.-2-19 | 0.0 | 94.7 | 61.8 | 100.0 | 92.8 | 3.0 | 8.5 | 62.9 | 100.0 | 100.0 | 0.0 | 100.0 | 8.5 |
|  |  | ±1.57 | ±4.65 | ±0.0 | ±4.52 | ±2.43 | ±2.25 | ±5.09 | ±0.0 | ±0.0 |  | ±0.0 | ±6.68 |
| Greenview c.-3-19 | 0.0 | 100.0 | 59.7 | 100.0 | 77.7 | 16.0 | 12.4 | 79.5 | 100.0 | 100.0 | 3.5 | 100.0 | 4.4 |
|  |  | ±0.0 | ±5.67 | ±0.0 | ±3.93 | ±3.42 | ±3.45 | ±2.99 | ±0.0 | ±0.0 | ±4.08 | ±0.0 | ±4.94 |
| Greenview c.-4-19 | 0.0 | 99.3 | 71.5 | 100.0 | 81.3 | 23.0 | 27.6 | 76.4 | 100.0 | 100.0 | 0.0 | 100.0 | 9.7 |
|  |  | 1.4 | ±6.43 | ±0.0 | ±2.87 | ±1.48 | ±4.04 | ±3.51 | ±0.0 | ±0.0 |  | ±0.0 | ±7.20 |
| Greenview c.-5-19 | 0.0 | 97.1 | 50.0 | 68.9 | 61.7 | 5.1 | 6.0 | 49.7 | 93.7 | 90.7 | 0.0 | 92.8 | 6.3 |
|  |  | ±3.29 | ±2.22 | ±2.84 | ±6.39 | ±2.60 | ±2.32 | ±1.75 | ±2.83 | ±3.23 |  | ±3.24 | ±7.82 |
| Greenview c.-6-19 | 0.0 | 100.0 | 66.5 | 100.0 | 82.7 | 11.4 | 6.5 | 78.5 | 100.0 | 100.0 | 4.4 | 100.0 | 11.0 |
|  |  | ±0.0 | ±6.04 | ±0.0 | ±4.09 | ±2.28 | ±3.22 | ±5.92 | ±0.0 | ±0.0 | ±4.94 | ±0.0 | ±3.75 |
| Greenview c.-7-19 | 0.0 | 100.0 | 56.1 | 100.0 | 75.9 | 13.7 | 25.7 | 61.8 | 100.0 | 100.0 | 4.4 | 100.0 | 14.8 |
|  |  | ±0.0 | ±2.43 | ±0.0 | ±2.90 | ±3.21 | ±8.13 | ±1.36 | ±0.0 | ±0.0 | ±4.94 | ±0.0 | ±7.63 |
| Greenview c.-9-19 | 0.0 | 100.0 | 39.1 | 97.2 | 53.7 | 11.0 | 9.9 | 19.5 | 97.1 | 94.9 | 3.7 | 100.0 | 4.4 |
|  |  | ±0.0 | ±2.53 | ±2.23 | ±3.11 | ±4.29 | ±1.39 | ±5.19 | ±3.29 | ±4.26 | ±4.38 | ±0.0 | ±4.94 |
| Greenview c.-11-19 | 0.0 | 100.0 | 59.8 | 100.0 | 58.5 | 12.9 | 15.6 | 60.4 | 100.0 | 69.6 | 0.0 | 100.0 | 4.4 |
|  |  | ±0.0 | ±6.53 | ±0.0 | ±6.13 | ±3.11 | ±1.32 | ±2.61 | ±0.0 | ±4.09 |  | ±0.0 | ±4.94 |
| Greenview c.-12-19 | 0.0 | 100.0 | 54.5 | 100.0 | 51.5 | 18.4 | 27.7 | 75.1 | 100.0 | 92.6 | 0.0 | 100.0 | 11.0 |
|  |  | ±0.0 | ±4.40 | ±0.0 | ±1.11 | ±2.57 | ±2.24 | ±2.03 | ±0.0 | ±5.09 |  | ±0.0 | ±3.75 |
| Greenview c.-13-19 | 0.0 | 100.0 | 61.0 | 100.0 | 74.8 | 21.2 | 26.3 | 79.6 | 100.0 | 100.0 | 0.0 | 100.0 | 11.0 |
|  |  | ±0.0 | ±4.93 | ±0.0 | ±3.71 | ±4.87 | ±1.44 | ±3.11 | ±0.0 | ±0.0 |  | ±0.0 | ±3.75 |
| Greenview c.-14-19 | 0.0 | 100.0 | 51.8 | 100.0 | 73.4 | 28.3 | 23.4 | 84.1 | 100.0 | 100.0 | 0.0 | 100.0 | 6.9 |
|  |  | ±0.0 | ±1.29 | ±0.0 | ±6.15 | ±4.68 | ±2.92 | ±2.57 | ±0.0 | ±0.0 |  | ±0.0 | ±4.53 |
| Greenview c.-15-19 | 0.0 | 100.0 | 28.0 | 91.5 | 74.7 | 10.9 | 9.5 | 59.0 | 100.0 | 78.3 | 0.0 | 100.0 | 4.2 |
|  |  | ±0.0 | ±5.50 | ±3.74 | ±2.93 | ±1.75 | ±2.84 | ±4.08 | ±0.0 | ±7.87 |  | ±0.0 | ±3.48 |
| St.Paul c.-1-19 | 0.0 | 100.0 | 56.7 | 100.0 | 54.6 | 24.7 | 12.1 | 52.5 | 100.0 | 100.0 | 0.0 | 100.0 | 4.4 |
|  |  | ±0.0 | ±2.92 | ±0.0 | ±3.40 | ±5.17 | ±4.53 | ±1.84 | ±0.0 | ±0.0 |  | ±0.0 | ±4.94 |
| St.Paul c.-2-19 | 0.0 | 100.0 | 62.6 | 100.0 | 67.4 | 12.6 | 0.0 | 19.4 | 92.5 | 88.9 | 4.4 | 100.0 | 17.2 |
|  |  | ±0.0 | ±7.42 | ±0.0 | ±6.83 | ±1.71 |  | ±4.97 | ±5.56 | ±5.47 | ±4.94 | ±0.0 | ±6.40 |
| St.Paul c.-3-19 | 0.0 | 100.0 | 83.7 | 100.0 | 91.0 | 12.1 | 10.1 | 53.2 | 100.0 | 94.6 | 2.1 | 100.0 | 4.4 |
|  |  | ±0.0 | ±2.81 | ±0.0 | ±6.81 | ±7.17 | ±5.40 | ±2.39 | ±0.0 | ±4.50 | ±4.08 | ±0.0 | ±4.94 |
| St.Paul c.-4-19 | 0.0 | 100.0 | 84.0 | 100.0 | 89.3 | 14.0 | 11.6 | 51.8 | 100.0 | 92.5 | 2.1 | 100.0 | 4.4 |
|  |  | ±0.0 | ±4.93 | ±0.0 | ±6.06 | ±1.88 | ±3.71 | ±1.29 | ±0.0 | ±3.41 | ±4.08 | ±0.0 | ±4.94 |
| St.Paul c.-5-19 | 0.0 | 100.0 | 53.9 | 100.0 | 81.2 | 21.2 | 15.2 | 56.1 | 100.0 | 87.2 | 4.4 | 100.0 | 4.4 |
|  |  | ±0.0 | ±3.42 | ±0.0 | ±3.37 | ±2.98 | ±2.67 | ±5.37 | ±0.0 | ±8.14 | ±4.94 | ±0.0 | ±4.94 |
| St.Paul c.-6-19 | 0.0 | 100.0 | 59.7 | 100.0 | 81.9 | 23.5 | 12.3 | 60.0 | 100.0 | 91.5 | 3.7 | 100.0 | 4.2 |
|  |  | ±0.0 | ±3.51 | ±0.0 | ±1.11 | ±3.33 | ±4.13 | ±3.86 | ±0.0 | ±6.46 | ±4.38 | ±0.0 | ±4.71 |
| Lamont c.-1-19 | 0.0 | 100.0 | 6.4 | 100.0 | 12.5 | 7.0 | 0.0 | 25.9 | 100.0 | 10.7 | 4.4 | 100.0 | 8.9 |
|  |  | ±0.0 | ±4.63 | ±0.0 | ±4.60 | ±3.42 |  | ±6.23 | ±0.0 | ±3.53 | ±4.94 | ±0.0 | ±6.71 |
| Lamont c.-2-19 | 0.0 | 100.0 | 75.4 | 100.0 | 87.1 | 16.7 | 12.0 | 51.5 | 88.1 | 85.9 | 14.6 | 95.6 | 84.5 |
|  |  | ±0.0 | ±9.88 | ±0.0 | ±8.44 | ±1.98 | ±3.31 | ±1.11 | ±6.29 | ±3.50 | ±2.61 | ±2.60 | ±6.54 |
| Lamont c.-3-19 | 0.0 | 100.0 | 52.8 | 97.9 | 85.5 | 23.6 | 6.8 | 41.0 | 91.8 | 92.2 | 2.1 | 95.1 | 15.2 |
|  |  | ±0.0 | ±2.22 | ±2.63 | ±3.37 | ±3.51 | ±2.78 | ±4.65 | ±7.98 | ±6.76 | ±4.08 | ±3.43 | ±6.49 |
| Lamont c.-4-19 | 0.0 | 94.3 | 61.0 | 96.4 | 68.3 | 13.0 | 8.7 | 66.0 | 100.0 | 100.0 | 14.2 | 97.1 | 90.6 |
|  |  | ±2.24 | ±4.93 | ±2.74 | ±8.26 | ±3.44 | ±3.60 | ±2.78 | ±0.0 | ±0.0 | ±2.31 | ±2.43 | ±6.66 |
| Lamont c.-5-19 | 0.0 | 100.0 | 66.0 | 97.9 | 75.7 | 12.2 | 12.1 | 49.1 | 95.7 | 97.8 | 6.4 | 96.4 | 97.9 |
|  |  | ±0.0 | ±2.78 | ±2.63 | ±5.27 | ±4.08 | ±2.98 | ±6.08 | ±3.45 | ±1.45 | ±7.89 | ±2.74 | ±2.61 |
| Lamont c.-6-19 | 0.0 | 97.9 | 58.6 | 100.0 | 62.2 | 22.7 | 14.4 | 56.9 | 87.7 | 91.9 | 0.0 | 86.7 | 10.7 |
|  |  | ±2.63 | ±5.42 | ±0.0 | ±5.39 | ±2.74 | ±3.53 | ±5.21 | ±6.59 | ±5.81 |  | ±7.33 | ±1.60 |
| Lamont c.-7-19 | 0.0 | 100.0 | 79.1 | 100.0 | 89.0 | 19.9 | 5.9 | 58.8 | 100.0 | 87.1 | 4.4 | 100.0 | 6.9 |
|  |  | ±0.0 | ±4.07 | ±0.0 | ±2.04 | ±3.95 | ±2.44 | ±1.53 | ±0.0 | ±3.11 | ±4.94 | ±0.0 | ±4.53 |
| T.hills c.-1-19 | 0.0 | 100.0 | 52.1 | 53.6 | 56.1 | 10.2 | 11.4 | 53.5 | 100.0 | 100.0 | 2.1 | 95.8 | 8.9 |
|  |  | ±0.0 | ±1.36 | ±2.47 | ±2.43 | ±3.58 | ±2.28 | ±2.61 | ±0.0 | ±0.0 | ±4.08 | ±3.48 | ±7.28 |
| T.hills c.-2-19 | 0.0 | 100.0 | 57.4 | 100.0 | 79.7 | 16.3 | 9.1 | 67.4 | 97.9 | 97.9 | 2.3 | 100.0 | 97.9 |
|  |  | ±0.0 | ±1.29 | ±0.0 | ±3.61 | ±2.34 | ±3.43 | ±5.04 | ±2.61 | ±2.61 | ±6.72 | ±0.0 | ±2.61 |
| T.hills c.-3-19 | 0.0 | 100.0 | 69.5 | 100.0 | 69.6 | 18.2 | 10.1 | 54.2 | 100.0 | 100.0 | 25.6 | 100.0 | 97.9 |
|  |  | ±0.0 | ±3.85 | ±0.0 | ±3.29 | ±5.49 | ±5.39 | ±3.27 | ±0.0 | ±0.0 | ±4.58 | ±0.0 | ±2.61 |
| T.hills c.-4-19 | 0.0 | 100.0 | 52.2 | 100.0 | 59.6 | 16.6 | 9.3 | 58.0 | 100.0 | 100.0 | 11.6 | 100.0 | 100.0 |
|  |  | ±0.0 | ±1.89 | ±0.0 | ±1.44 | ±3.13 | ±5.76 | ±6.59 | ±0.0 | ±0.0 | ±1.96 | ±0.0 | ±0.0 |
| V.river c.-1-19 | 0.0 | 100.0 | 68.9 | 100.0 | 85.4 | 12.2 | 5.3 | 25.2 | 100.0 | 90.4 | 5.0 | 100.0 | 0.0 |
|  |  | ±0.0 | ±2.84 | ±0.0 | ±4.37 | ±3.67 | ±1.57 | ±8.99 | ±0.0 | ±4.95 | ±3.47 | ±0.0 |  |
| V.river c.-2-19 | 0.0 | 100.0 | 71.1 | 100.0 | 94.2 | 15.7 | 10.5 | 51.4 | 100.0 | 100.0 | 6.3 | 100.0 | 8.5 |
|  |  | ±0.0 | ±6.84 | ±0.0 | ±2.92 | ±3.05 | ±4.48 | ±2.72 | ±0.0 | ±0.0 | ±7.82 | ±0.0 | ±6.68 |
| Pioneer-1-19 | 0.0 | 100.0 | 35.6 | 100.0 | 72.5 | 14.2 | 13.1 | 44.4 | 100.0 | 80.5 | 2.1 | 100.0 | 16.2 |
|  |  | ±0.0 | ±1.51 | ±0.0 | ±4.04 | ±2.31 | ±3.61 | ±3.70 | ±0.0 | ±7.33 | ±4.08 | ±0.0 | ±6.54 |
| Pioneer-2-19 | 0.0 | 100.0 | 53.7 | 100.0 | 61.0 | 21.0 | 20.1 | 70.8 | 100.0 | 100.0 | 17.0 | 100.0 | 100.0 |
|  |  | ±0.0 | ±3.11 | ±0.0 | ±5.89 | ±4.82 | ±4.26 | ±6.48 | ±0.0 | ±0.0 | ±4.78 | ±0.0 | ±0.0 |
| Ponoka c.-1-19 | 0.0 | 100.0 | 70.4 | 100.0 | 75.0 | 10.4 | 0.0 | 44.4 | 100.0 | 84.2 | 52.2 | 100.0 | 100.0 |
|  |  | ±0.0 | ±2.87 | ±0.0 | ±3.48 | ±3.14 |  | ±2.22 | ±0.0 | ±3.83 | ±1.47 | ±0.0 | ±0.0 |
| R.deer c.-1-19 | 0.0 | 100.0 | 95.6 | 26.6 | 7.9 | 90.8 | 0.0 | 31.3 | 100.0 | 100.0 | 60.8 | 100.0 | 100.0 |
|  |  | ±0.0 | ±1.66 | ±7.04 | ±4.38 | ±1.29 |  | ±4.65 | ±0.0 | ±0.0 | ±2.53 | ±0.0 | ±0.0 |
| R.deer c.-2-19 | 0.0 | 100.0 | 100.0 | 24.7 | 4.2 | 95.8 | 0.0 | 25.6 | 100.0 | 100.0 | 70.1 | 100.0 | 100.0 |
|  |  | ±0.0 | ±0.0 | ±2.04 | ±5.21 | ±3.51 |  | ±5.99 | ±0.0 | ±0.0 | ±5.70 | ±0.0 | ±0.0 |
| R.deer c.-3-19 | 0.0 | 100.0 | 93.0 | 37.5 | 3.6 | 91.3 | 0.0 | 21.5 | 100.0 | 100.0 | 68.0 | 100.0 | 100.0 |
|  |  | ±0.0 | ±7.16 | ±6.48 | ±4.17 | ±2.37 |  | ±6.81 | ±0.0 | ±0.0 | ±6.95 | ±0.0 | ±0.0 |
| R.deer c.-4-19 | 0.0 | 100.0 | 100.0 | 23.3 | 5.6 | 100.0 | 0.0 | 30.2 | 100.0 | 100.0 | 67.4 | 100.0 | 100.0 |
|  |  | ±0.0 | ±0.0 | ±10.25 | ±4.93 | ±0.0 |  | ±8.29 | ±0.0 | ±0.0 | ±8.13 | ±0.0 | ±0.0 |
| Kneehill-1-19 | 0.0 | 100.0 | 81.9 | 100.0 | 87.5 | 20.3 | 41.0 | 75.0 | 100.0 | 100.0 | 2.3 | 100.0 | 4.4 |
|  |  | ±0.0 | ±5.21 | ±0.0 | ±3.51 | ±2.62 | ±3.43 | ±5.88 | ±0.0 | ±0.0 | ±4.45 | ±0.0 | ±4.94 |
| Rocky.V c.-1-19 | 0.0 | 97.2 | 2.1 | 96.5 | 2.3 | 6.5 | 0.0 | 12.8 | 97.0 | 0.0 | 0.0 | 97.7 | 8.5 |
|  |  | ±2.23 | ±4.08 | ±3.41 | ±4.45 | ±2.71 |  | ±3.72 | ±2.24 |  |  | ±1.51 | ±6.68 |
| Fisher-3-19 | 0.0 | 100.0 | 73.7 | 100.0 | 95.6 | 13.9 | 9.9 | 72.7 | 100.0 | 92.0 | 68.4 | 100.0 | 100.0 |
|  |  | ±0.0 | ±6.82 | ±0.0 | ±3.52 | ±4.16 | ±2.81 | ±7.27 | ±0.0 | ±1.65 | ±3.98 | ±0.0 | ±0.0 |
| SK-AN-2019-01 | 0.0 | 95.5 | 52.8 | 94.3 | 52.8 | 11.0 | 3.0 | 41.9 | 97.1 | 86.1 | 0.0 | 97.2 | 5.9 |
|  |  | ±1.50 | ±2.22 | ±2.13 | ±2.22 | ±2.04 | ±2.24 | ±3.87 | ±2.24 | ±2.80 |  | ±3.85 | ±4.04 |
| SK-01-19 | 0.0 | 100.0 | 61.1 | 100.0 | 81.8 | 10.7 | 2.1 | 39.6 | 100.0 | 100.0 | 4.4 | 100.0 | 8.5 |
|  |  | ±0.0 | ±6.29 | ±0.0 | ±6.32 | ±3.13 | ±2.61 | ±7.82 | ±0.0 | ±0.0 | ±4.94 | ±0.0 | ±6.68 |
| SK-02-19 | 0.0 | 91.1 | 0.0 | 87.9 | 7.4 | 13.9 | 2.9 | 14.8 | 87.6 | 85.3 | 1.5 | 87.4 | 22.2 |
|  |  | ±2.35 |  | ±2.17 | ±4.94 | ±3.28 | ±3.29 | ±3.83 | ±3.45 | ±3.52 | ±2.97 | ±1.22 | ±4.70 |
| SK-F-128-19 | 0.0 | 91.1 | 28.5 | 58.1 | 33.9 | 13.7 | 0.0 | 28.3 | 94.0 | 84.2 | 2.1 | 91.6 | 8.5 |
|  |  | ±2.16 | ±6.14 | ±4.79 | ±4.33 | ±3.21 |  | ±3.68 | ±2.06 | ±2.03 | ±4.08 | ±1.93 | ±6.68 |
| SK-F-152-19 | 0.0 | 100.0 | 54.0 | 100.0 | 90.7 | 8.0 | 5.9 | 43.0 | 100.0 | 87.3 | 3.7 | 100.0 | 8.5 |
|  |  | ±0.0 | ±3.24 | ±0.0 | ±5.76 | ±2.57 | ±5.30 | ±2.93 | ±0.0 | ±3.67 | ±4.38 | ±0.0 | ±6.68 |
| SK-F-170-19 | 0.0 | 100.0 | 58.2 | 95.8 | 91.8 | 3.7 | 3.0 | 38.2 | 100.0 | 83.2 | 4.4 | 100.0 | 11.2 |
|  |  | ±0.0 | ±2.03 | ±3.48 | ±3.57 | ±2.72 | ±2.24 | ±3.43 | ±0.0 | ±4.98 | ±4.94 | ±0.0 | ±8.12 |
| MB-1-19 | 0.0 | 100.0 | 4.4 | 15.8 | 4.6 | 5.7 | 70.9 | 80.9 | 100.0 | 100.0 | 3.6 | 100.0 | 8.9 |
|  |  | ±0.0 | ±4.94 | ±10.78 | ±5.23 | ±2.13 | ±6.46 | ±3.62 | ±0.0 | ±0.0 | ±4.17 | ±0.0 | ±6.71 |
| **2020** |  |  |  |  |  |  |  |  |  |  |  |  |  |
|  |  |  |  |  |  |  |  |  |  |  |  |  |  |
| Rocky.V c.-1-20 | 0.0 | 91.2 | 0.0 | 92.2 | 0.0 | 0.0 | 0.0 | 10.6 | 90.6 | 0.0 | 0.0 | 91.8 | 3.5 |
|  |  | ±1.81 |  | ±1.74 |  |  |  | ±2.43 | ±2.69 |  |  | ±2.28 | ±4.08 |
| Rocky.V c.-2-20 | 0.0 | 92.2 | 0.0 | 91.2 | 0.0 | 0.0 | 0.0 | 10.3 | 91.2 | 0.0 | 0.0 | 92.5 | 3.6 |
|  |  | ±2.49 |  | ±1.81 |  |  |  | ±3.18 | ±2.65 |  |  | ±1.38 | ±4.17 |
| Strathcona c.-1-20 | 0.0 | 100.0 | 67.4 | 100.0 | 100.0 | 8.7 | 19.8 | 81.1 | 100.0 | 100.0 | 72.4 | 100.0 | 100.0 |
|  |  | ±0.0 | ±1.48 | ±0.0 | ±0.0 | ±3.86 | ±1.67 | ±1.89 | ±0.0 | ±0.0 | ±8.33 | ±0.0 | ±0.0 |
| Mount.V c.-1-20 | 0.0 | 100.0 | 78.9 | 100.0 | 91.7 | 5.8 | 9.0 | 55.2 | 100.0 | 100.0 | 15.7 | 100.0 | 10.2 |
|  |  | ±0.0 | ±6.06 | ±0.0 | ±2.67 | ±2.01 | ±3.01 | ±3.54 | ±0.0 | ±0.0 | ±4.12 | ±0.0 | ±4.35 |
| Wheatland c.-1-20 | 0.0 | 97.2 | 4.4 | 95.0 | 0.7 | 0.0 | 0.0 | 21.2 | 94.8 | 0.0 | 7.8 | 94.7 | 6.3 |
|  |  | ±2.23 | ±4.94 | ±3.47 | ±1.36 |  |  | ±2.98 | ±2.45 |  | ±6.76 | ±2.74 | ±7.82 |
| Wainwright c.-1-20 | 0.0 | 100.0 | 19.8 | 100.0 | 81.5 | 4.2 | 0.0 | 9.8 | 100.0 | 63.8 | 52.1 | 100.0 | 78.7 |
|  |  | ±0.0 | ±4.54 | ±0.0 | ±2.19 | ±1.50 |  | ±3.33 | ±0.0 | ±0.14 | ±0.71 | ±0.0 | ±1.28 |
| R.deer c.-1-20 | 0.0 | 90.0 | 42.1 | 51.5 | 31.2 | 15.5 | 0.0 | 40.1 | 94.1 | 36.3 | 38.7 | 94.8 | 94.0 |
|  |  | ±3.13 | ±4.41 | ±2.10 | ±1.41 | ±2.71 |  | ±2.76 | ±2.18 | ±5.29 | ±2.54 | ±2.45 | ±2.57 |
| R.deer c.-2-20 | 0.0 | 100.0 | 100.0 | 11.0 | 2.1 | 100.0 | 0.0 | 19.9 | 100.0 | 100.0 | 61.6 | 100.0 | 100.0 |
|  |  | ±0.0 | ±0.0 | ±3.74 | ±4.08 | ±0.0 |  | ±2.39 | ±0.0 | ±0.0 | ±4.30 | ±0.0 | ±0.0 |
| R.deer c.-3-20 | 0.0 | 87.6 | 22.4 | 87.1 | 4.4 | 18.0 | 0.0 | 10.7 | 87.0 | 67.9 | 14.7 | 86.7 | 89.9 |
|  |  | 3.5 | ±2.99 | ±2.58 | ±3.52 | ±3.31 |  | ±1.60 | ±3.44 | ±5.38 | ±3.52 | ±3.57 | ±4.81 |
| Birch.H c.-1-20 | 0.0 | 95.5 | 42.7 | 97.9 | 40.5 | 17.4 | 20.6 | 45.8 | 98.5 | 91.1 | 3.5 | 98.4 | 4.4 |
|  |  | ±1.50 | ±4.01 | ±2.63 | ±3.53 | ±1.82 | ±4.51 | ±1.81 | ±1.65 | ±4.21 | ±4.08 | ±1.80 | ±4.94 |
| Birch.H c.-2-20 | 0.0 | 98.5 | 24.5 | 97.1 | 28.0 | 16.1 | 7.2 | 21.7 | 93.9 | 85.8 | 14.6 | 97.1 | 8.5 |
|  |  | 1.7 | ±4.41 | ±3.29 | ±4.45 | ±2.53 | ±4.52 | ±4.18 | ±2.47 | ±5.05 | ±3.1 | ±3.29 | ±6.68 |
| Birch.H c.-3-20 | 0.0 | 97.8 | 15.8 | 93.4 | 28.8 | 17.6 | 8.4 | 18.4 | 94.0 | 85.8 | 17.7 | 93.2 | 10.2 |
|  |  | ±2.67 | ±3.83 | ±2.67 | ±5.69 | ±5.28 | ±1.65 | ±4.92 | ±2.17 | ±4.90 | ±1.32 | ±3.06 | ±7.41 |
| Smoky.R c.-1-20 | 0.0 | 94.7 | 56.4 | 94.8 | 55.1 | 13.1 | 11.6 | 35.3 | 94.7 | 73.4 | 12.7 | 94.9 | 9.3 |
|  |  | ±1.57 | ±4.81 | ±2.45 | ±2.75 | ±4.34 | ±5.85 | ±5.75 | ±2.61 | ±2.64 | ±3.67 | ±2.40 | ±6.76 |
| Smoky.R c.-2-20 | 0.0 | 97.9 | 61.6 | 97.8 | 52.5 | 26.9 | 10.9 | 31.3 | 97.9 | 58.2 | 12.4 | 96.4 | 19.6 |
|  |  | 2.6 | ±4.26 | ±2.82 | ±0.62 | ±6.13 | ±1.25 | ±2.61 | ±2.63 | ±3.10 | ±2.91 | ±2.74 | ±5.92 |
| Smoky.R c.-3-20 | 0.0 | 94.9 | 55.5 | 93.0 | 54.4 | 11.8 | 3.1 | 44.3 | 95.4 | 57.0 | 15.4 | 97.9 | 58.9 |
|  |  | ±2.60 | ±3.91 | ±2.92 | ±2.83 | ±5.84 | ±2.68 | ±3.01 | ±5.17 | ±4.51 | ±3.58 | ±2.63 | ±2.49 |
| Athabasca c.-1-20 | 0.0 | 94.7 | 55.3 | 95.6 | 58.6 | 11.4 | 9.6 | 31.3 | 94.9 | 85.8 | 7.5 | 95.6 | 4.4 |
|  |  | ±1.68 | ±3.53 | ±3.55 | ±1.00 | ±1.76 | ±2.46 | ±6.10 | ±4.30 | ±5.63 | ±2.72 | ±3.81 | ±4.94 |
| Athabasca c.-2-20 | 0.0 | 94.9 | 55.6 | 95.3 | 58.0 | 11.6 | 10.1 | 27.3 | 93.3 | 83.7 | 9.7 | 95.6 | 6.8 |
|  |  | ±2.40 | ±3.70 | ±1.90 | ±3.32 | ±5.85 | ±5.55 | ±4.20 | ±1.18 | ±3.53 | ±3.83 | ±3.69 | ±2.64 |
| Sturgeon c.-1-20 | 0.0 | 97.0 | 53.3 | 95.8 | 54.6 | 10.6 | 9.2 | 53.9 | 97.0 | 77.3 | 5.7 | 96.3 | 94.2 |
|  |  | ±2.24 | ±2.82 | ±3.48 | ±2.57 | ±1.29 | ±6.93 | ±1.99 | ±2.24 | ±5.33 | ±2.13 | ±2.70 | ±2.01 |
| Sturgeon c.-2-20 | 0.0 | 94.2 | 31.3 | 93.5 | 53.2 | 13.9 | 9.5 | 34.8 | 97.0 | 75.9 | 2.9 | 94.9 | 85.2 |
|  |  | ±2.92 | ±6.04 | ±2.71 | ±1.67 | ±4.21 | ±2.07 | ±1.65 | ±2.24 | ±4.94 | ±3.29 | ±2.40 | ±4.33 |
| ABtaC.-3-20/Bayer-1-20 | 0.0 | 97.9 | 58.2 | 98.5 | 56.7 | 14.5 | 8.6 | 36.4 | 98.4 | 55.4 | 7.3 | 94.1 | 5.7 |
|  |  | ±2.63 | ±2.03 | ±1.65 | ±1.90 | ±5.40 | ±1.81 | ±5.94 | ±1.80 | ±2.11 | ±1.68 | ±3.22 | ±4.04 |
| Bayer-2-20 | 0.0 | 98.5 | 32.8 | 95.4 | 12.5 | 5.9 | 3.6 | 22.9 | 94.6 | 34.7 | 0.0 | 94.7 | 5.7 |
|  |  | ±1.74 | ±8.41 | ±1.97 | ±4.71 | ±2.44 | ±2.74 | ±4.65 | ±1.42 | ±1.57 |  | ±2.37 | ±4.04 |
| G.Prairie c.-1-20 | 0.0 | 95.8 | 52.9 | 95.5 | 66.6 | 13.2 | 12.4 | 31.2 | 94.8 | 73.3 | 7.1 | 96.2 | 4.4 |
|  |  | ±3.48 | ±1.22 | ±3.74 | ±2.55 | ±3.07 | ±3.79 | ±6.81 | ±4.21 | ±5.57 | ±5.74 | ±1.49 | ±4.94 |
| Greenview c.-1-20 | 0.0 | 94.0 | 22.7 | 93.2 | 34.7 | 14.2 | 11.5 | 30.6 | 93.3 | 66.1 | 2.2 | 93.2 | 6.4 |
|  |  | ±2.32 | ±1.60 | ±2.64 | ±5.02 | ±4.02 | ±5.64 | ±5.44 | ±2.54 | ±5.30 | ±2.67 | ±2.64 | ±4.22 |
| Greenview c.-2-20 | 0.0 | 94.7 | 76.4 | 94.9 | 78.3 | 11.9 | 13.5 | 54.5 | 93.9 | 78.1 | 6.4 | 93.3 | 8.8 |
|  |  | ±1.57 | ±7.20 | ±4.26 | ±4.58 | ±5.51 | ±4.51 | ±2.98 | ±2.55 | ±3.85 | ±7.89 | ±2.54 | ±6.72 |
| Greenview c.-3-20 | 0.0 | 94.8 | 73.2 | 94.9 | 75.2 | 13.5 | 10.0 | 57.6 | 94.9 | 67.2 | 8.5 | 94.9 | 9.2 |
|  |  | ±2.45 | ±1.67 | ±4.26 | ±1.67 | ±4.51 | ±6.19 | ±6.43 | ±4.26 | ±7.43 | ±7.89 | ±4.26 | ±6.79 |
| Leduc c.-1-20 | 0.0 | 100.0 | 55.3 | 92.5 | 51.8 | 10.5 | 10.9 | 52.2 | 100.0 | 100.0 | 21.8 | 100.0 | 100.0 |
|  |  | ±0.0 | ±2.57 | ±1.38 | ±1.29 | ±4.38 | ±3.01 | ±1.89 | ±0.0 | ±0.0 | ±3.71 | ±0.0 | ±0.0 |
| Leduc c.-2-20 | 0.0 | 93.4 | 52.3 | 89.6 | 52.2 | 11.0 | 8.9 | 45.7 | 90.5 | 45.9 | 8.2 | 85.8 | 86.1 |
|  |  | ±2.59 | ±0.90 | ±1.59 | ±1.47 | ±3.75 | ±3.85 | ±1.43 | ±1.77 | ±1.22 | ±2.73 | ±3.75 | ±3.96 |
| Leduc c.-3-20 | 0.0 | 100.0 | 53.4 | 92.6 | 51.9 | 10.3 | 9.8 | 44.7 | 94.0 | 80.7 | 15.2 | 91.6 | 93.9 |
|  |  | ±0.0 | ±0.82 | ±1.57 | ±1.45 | ±4.55 | ±3.16 | ±0.99 | ±2.28 | ±3.29 | ±7.21 | ±1.65 | ±2.47 |
| Leduc c.-4-20 | 0.0 | 100.0 | 57.7 | 100.0 | 55.8 | 14.2 | 8.6 | 46.5 | 100.0 | 100.0 | 35.4 | 100.0 | 100.0 |
|  |  | ±0.0 | ±1.78 | ±0.0 | ±5.19 | ±4.02 | ±3.62 | ±4.01 | ±0.0 | ±0.0 | ±4.73 | ±0.0 | ±0.0 |
| Leduc c.-5-20 | 0.0 | 100.0 | 58.6 | 100.0 | 61.5 | 12.0 | 10.1 | 53.2 | 100.0 | 100.0 | 8.5 | 100.0 | 100.0 |
|  |  | ±0.0 | ±1.00 | ±0.0 | ±1.19 | ±5.02 | ±5.40 | ±1.67 | ±0.0 | ±0.0 | ±6.68 | ±0.0 | ±0.0 |
| Leduc c.-6-20 | 0.0 | 100.0 | 56.4 | 100.0 | 60.1 | 12.4 | 10.4 | 56.8 | 100.0 | 100.0 | 22.5 | 100.0 | 100.0 |
|  |  | ±0.0 | ±2.39 | ±0.0 | ±2.45 | ±2.91 | ±3.14 | ±2.47 | ±0.0 | ±0.0 | ±4.55 | ±0.0 | ±0.0 |
| Leduc c.-7-20 | 0.7 | 93.9 | 54.1 | 87.3 | 51.9 | 14.6 | 10.1 | 41.4 | 91.6 | 46.1 | 24.9 | 91.2 | 92.7 |
|  | ±1.36 | ±2.04 | ±1.22 | ±2.12 | ±1.45 | ±3.24 | ±5.40 | ±1.00 | ±1.65 | ±3.42 | ±3.73 | ±1.81 | ±1.68 |
| Leduc c.-8-20 | 0.0 | 100.0 | 52.5 | 88.5 | 53.9 | 8.7 | 9.6 | 44.0 | 100.0 | 80.5 | 17.7 | 100.0 | 92.5 |
|  |  | ±0.0 | ±2.31 | ±5.64 | ±2.19 | ±5.72 | ±3.23 | ±2.74 | ±0.0 | ±4.05 | ±4.91 | ±0.0 | ±3.60 |
| Leduc c.-9-20 | 0.0 | 93.4 | 54.9 | 94.8 | 59.7 | 9.8 | 8.8 | 43.7 | 89.6 | 60.0 | 53.7 | 93.9 | 94.1 |
|  |  | ±2.67 | ±1.62 | ±2.45 | ±0.96 | ±4.77 | ±1.81 | ±2.42 | ±3.14 | ±1.18 | ±1.00 | ±2.47 | ±3.22 |
| Leduc c.-10-20 | 0.0 | 100.0 | 34.1 | 91.1 | 34.1 | 11.6 | 5.8 | 12.9 | 100.0 | 82.4 | 22.6 | 100.0 | 91.9 |
|  |  | ±0.0 | ±7.42 | ±0.78 | ±2.67 | ±4.44 | ±2.01 | ±3.11 | ±0.0 | ±6.09 | ±2.34 | ±0.0 | ±1.00 |
| Leduc c.-11-20 | 0.0 | 100.0 | 61.3 | 94.6 | 60.6 | 13.6 | 11.2 | 45.3 | 100.0 | 100.0 | 51.9 | 100.0 | 100.0 |
|  |  | ±0.0 | ±2.98 | ±1.42 | ±0.45 | ±3.64 | ±3.59 | ±2.45 | ±0.0 | ±0.0 | ±1.45 | ±0.0 | ±0.0 |
| Leduc c.-12-20 | 0.0 | 90.3 | 53.8 | 90.1 | 52.9 | 8.9 | 9.6 | 38.5 | 90.4 | 63.8 | 11.2 | 90.4 | 83.0 |
|  |  | ±2.36 | ±2.58 | ±1.61 | ±2.54 | ±2.15 | ±1.17 | ±2.45 | ±1.17 | ±2.24 | ±3.59 | ±3.36 | ±0.74 |
| Leduc c.-13-20 | 0.0 | 100.0 | 53.4 | 97.2 | 58.5 | 8.8 | 10.2 | 54.2 | 100.0 | 77.4 | 8.5 | 100.0 | 91.2 |
|  |  | ±0.0 | ±0.82 | ±2.23 | ±1.59 | ±5.64 | ±4.35 | ±1.81 | ±0.0 | ±2.34 | ±6.68 | ±0.0 | ±1.81 |
| Leduc c.-14-20 | 0.0 | 91.1 | 53.4 | 89.2 | 52.6 | 10.4 | 11.8 | 44.5 | 89.5 | 59.9 | 4.4 | 88.1 | 95.6 |
|  |  | ±3.49 | ±0.82 | ±5.17 | ±0.75 | ±3.14 | ±3.54 | ±3.07 | ±3.30 | ±2.76 | ±4.94 | ±2.16 | ±1.66 |
| Leduc c.-15-20 | 0.0 | 100.0 | 53.9 | 100.0 | 52.6 | 8.1 | 10.4 | 44.5 | 100.0 | 75.1 | 14.3 | 100.0 | 95.4 |
|  |  | ±0.0 | ±3.67 | ±0.0 | ±1.41 | ±4.71 | ±1.59 | ±4.62 | ±0.0 | ±3.36 | ±3.09 | ±0.0 | ±3.02 |
| Leduc c.-16-20 | 0.0 | 100.0 | 62.3 | 100.0 | 54.1 | 10.0 | 10.2 | 43.3 | 100.0 | 77.8 | 10.3 | 100.0 | 100.0 |
|  |  | ±0.0 | ±3.81 | ±0.0 | ±1.22 | ±4.51 | ±4.35 | ±3.67 | ±0.0 | ±9.43 | ±0.96 | ±0.0 | ±0.0 |
| Leduc c.-17-20 | 0.0 | 100.0 | 54.4 | 100.0 | 56.4 | 9.6 | 7.6 | 52.6 | 100.0 | 74.1 | 38.2 | 100.0 | 100.0 |
|  |  | ±0.0 | ±2.22 | ±0.0 | ±2.39 | ±4.78 | ±1.74 | ±0.75 | ±0.0 | ±2.72 | ±4.65 | ±0.0 | ±0.0 |
| Leduc c.-18-20 | 0.0 | 100.0 | 57.6 | 100.0 | 52.5 | 8.8 | 9.4 | 53.4 | 100.0 | 69.0 | 21.8 | 100.0 | 100.0 |
|  |  | ±0.0 | ±2.24 | ±0.0 | ±1.84 | ±1.81 | ±4.58 | ±0.82 | ±0.0 | ±1.54 | ±3.71 | ±0.0 | ±0.0 |
| Leduc c.-19-20 | 0.0 | 100.0 | 56.2 | 100.0 | 51.8 | 21.2 | 6.9 | 53.8 | 100.0 | 53.0 | 8.5 | 100.0 | 96.3 |
|  |  | ±0.0 | ±3.14 | ±0.0 | ±1.29 | ±6.91 | ±2.83 | ±2.58 | ±0.0 | ±1.23 | ±6.68 | ±0.0 | ±2.70 |
| Leduc c.-20-20 | 0.0 | 90.9 | 51.9 | 91.0 | 51.9 | 10.7 | 10.2 | 25.7 | 91.1 | 53.6 | 8.5 | 90.5 | 14.4 |
|  |  | ±2.12 | ±1.45 | ±1.91 | ±1.45 | ±5.73 | ±3.00 | ±3.87 | ±2.15 | ±2.15 | ±6.68 | ±1.77 | ±1.47 |
| Leduc c.-21-20 | 0.0 | 100.0 | 62.2 | 100.0 | 64.6 | 14.9 | 9.6 | 29.4 | 100.0 | 76.1 | 8.7 | 90.9 | 91.1 |
|  |  | ±0.0 | ±2.55 | ±0.0 | ±4.08 | ±4.50 | ±4.54 | ±3.01 | ±0.0 | ±8.45 | ±2.26 | ±2.52 | ±2.15 |
| Leduc c.-22-20 | 0.0 | 100.0 | 57.5 | 100.0 | 54.6 | 11.8 | 8.8 | 22.9 | 100.0 | 62.8 | 11.9 | 91.2 | 91.1 |
|  |  | ±0.0 | ±2.52 | ±0.0 | ±2.10 | ±3.54 | ±1.81 | ±6.56 | ±0.0 | ±3.04 | ±4.69 | ±1.81 | ±2.15 |
| Leduc c.-23-20 | 0.7 | 100.0 | 68.2 | 90.7 | 61.3 | 15.7 | 13.1 | 30.4 | 100.0 | 44.0 | 10.0 | 90.4 | 91.0 |
|  | ±1.36 | ±0.0 | ±1.74 | ±0.45 | ±1.57 | ±3.93 | ±4.34 | ±2.24 | ±0.0 | ±3.02 | ±4.51 | ±1.17 | ±1.78 |
| Leduc c.-24-20 | 0.0 | 100.0 | 57.8 | 100.0 | 56.3 | 11.0 | 9.7 | 51.9 | 100.0 | 62.8 | 4.4 | 100.0 | 100.0 |
|  |  | ±0.0 | ±2.45 | ±0.0 | ±4.67 | ±2.04 | ±2.36 | ±1.45 | ±0.0 | ±2.88 | ±3.52 | ±0.0 | ±0.0 |
| Leduc c.-25-20 | 0.0 | 90.9 | 55.3 | 91.1 | 53.2 | 10.9 | 10.1 | 51.9 | 93.2 | 52.3 | 6.4 | 90.6 | 91.6 |
|  |  | ±2.12 | ±1.76 | ±2.26 | ±2.93 | ±4.18 | ±4.57 | ±1.45 | ±2.11 | ±0.90 | ±7.89 | ±5.39 | ±2.85 |
| Leduc c.-26-20 | 1.7 | 95.4 | 71.0 | 93.8 | 70.4 | 13.5 | 4.4 | 55.1 | 91.9 | 85.0 | 32.0 | 92.0 | 71.0 |
|  | ±3.27 | ±1.97 | ±4.94 | ±2.82 | ±2.70 | ±1.67 | ±1.35 | ±1.96 | ±2.44 | ±3.06 | ±5.28 | ±2.21 | ±5.24 |
| Leduc c.-27-20 | 0.0 | 92.2 | 70.3 | 91.6 | 73.6 | 12.2 | 10.1 | 50.0 | 92.2 | 78.0 | 43.4 | 82.5 | 72.5 |
|  |  | ±1.74 | ±7.98 | ±1.65 | ±6.18 | ±3.14 | ±4.81 | ±1.21 | ±2.03 | ±4.57 | ±7.46 | ±1.38 | ±2.83 |
| S-1-20 | 0.0 | 100.0 | 71.8 | 100.0 | 72.1 | 29.1 | 11.7 | 55.7 | 100.0 | 67.3 | 15.2 | 100.0 | 97.9 |
|  |  | ±0.0 | ±3.50 | ±0.0 | ±5.13 | ±5.81 | ±2.76 | ±3.93 | ±0.0 | ±5.33 | ±7.21 | ±0.0 | ±2.61 |
| S-2-20 | 0.0 | 100.0 | 70.3 | 100.0 | 84.2 | 43.6 | 10.6 | 79.4 | 100.0 | 84.3 | 73.4 | 100.0 | 100.0 |
|  |  | ±0.0 | ±4.17 | ±0.0 | ±3.96 | ±4.13 | ±3.74 | ±1.83 | ±0.0 | ±3.36 | ±2.64 | ±0.0 | ±0.0 |
| S-3-20 | 0.0 | 100.0 | 100.0 | 100.0 | 100.0 | 38.8 | 9.2 | 55.5 | 100.0 | 100.0 | 69.2 | 100.0 | 100.0 |
|  |  | ±0.0 | ±0.0 | ±0.0 | ±0.0 | ±8.07 | ±1.85 | ±2.80 | ±0.0 | ±0.0 | ±3.13 | ±0.0 | ±0.0 |
| S-4-20 | 2.1 | 100.0 | 100.0 | 100.0 | 100.0 | 34.5 | 19.0 | 54.5 | 100.0 | 100.0 | 53.5 | 100.0 | 100.0 |
|  | ±4.08 | ±0.0 | ±0.0 | ±0.0 | ±0.0 | ±5.42 | ±0.90 | ±0.89 | ±0.0 | ±0.0 | ±0.73 | ±0.0 | ±0.0 |
| S-5-20 | 0.0 | 100.0 | 100.0 | 100.0 | 100.0 | 29.6 | 18.2 | 53.6 | 100.0 | 100.0 | 53.3 | 100.0 | 100.0 |
|  |  | ±0.0 | ±0.0 | ±0.0 | ±0.0 | ±2.93 | ±4.03 | ±1.77 | ±0.0 | ±0.0 | ±1.65 | ±0.0 | ±0.0 |
| S-6-20 | 0.0 | 94.2 | 56.8 | 86.4 | 56.3 | 18.4 | 9.0 | 53.4 | 92.8 | 60.7 | 6.8 | 93.1 | 78.0 |
|  |  | ±2.01 | ±2.60 | ±3.21 | ±1.95 | ±2.57 | ±1.78 | ±2.19 | ±3.24 | ±5.25 | ±2.78 | ±2.51 | ±5.01 |
| S-7-20 | 0.0 | 88.2 | 66.7 | 86.7 | 73.0 | 18.1 | 6.5 | 32.0 | 88.8 | 71.6 | 53.7 | 87.7 | 88.1 |
|  |  | ±6.78 | ±2.32 | ±2.37 | ±8.04 | ±1.98 | ±5.00 | ±3.76 | ±2.09 | ±7.66 | ±1.70 | ±3.38 | ±2.16 |
| S-8-20 | 0.0 | 90.7 | 56.3 | 89.2 | 56.0 | 27.2 | 3.1 | 56.8 | 92.3 | 81.7 | 59.8 | 91.7 | 86.4 |
|  |  | ±3.12 | ±1.59 | ±2.23 | ±3.13 | ±4.44 | ±2.43 | ±3.44 | ±2.16 | ±6.26 | ±1.53 | ±3.54 | ±1.23 |
| S-9-20 | 0.0 | 88.4 | 57.0 | 84.7 | 55.9 | 16.5 | 10.4 | 52.6 | 88.6 | 79.2 | 5.1 | 87.7 | 81.7 |
|  |  | ±2.40 | ±4.17 | ±5.23 | ±2.85 | ±2.73 | ±4.93 | ±0.75 | ±4.10 | ±3.18 | ±3.50 | ±3.38 | ±2.77 |
| S-10-20 | 0.0 | 100.0 | 88.0 | 100.0 | 66.7 | 32.4 | 9.9 | 51.9 | 100.0 | 100.0 | 86.4 | 100.0 | 100.0 |
|  |  | ±0.0 | ±6.80 | ±0.0 | ±5.88 | ±2.82 | ±1.61 | ±1.45 | ±0.0 | ±0.0 | ±2.11 | ±0.0 | ±0.0 |
| S-11-20 | 0.0 | 94.1 | 56.9 | 87.2 | 72.8 | 24.5 | 10.1 | 48.5 | 84.8 | 65.3 | 28.5 | 93.4 | 86.8 |
|  |  | ±2.18 | ±4.60 | ±2.19 | ±4.27 | ±6.42 | ±1.14 | ±2.10 | ±2.10 | ±5.02 | ±4.15 | ±2.59 | ±3.12 |
| S-12-20 | 0.0 | 100.0 | 63.2 | 90.9 | 88.7 | 22.6 | 8.5 | 28.1 | 89.6 | 66.6 | 60.6 | 91.8 | 90.3 |
|  |  | ±0.0 | ±4.08 | ±2.12 | ±4.57 | ±4.46 | ±1.38 | ±5.68 | ±1.59 | ±2.32 | ±2.84 | ±2.28 | ±2.36 |
| S-13-20 | 0.0 | 92.9 | 64.4 | 90.4 | 67.5 | 10.5 | 12.8 | 53.1 | 91.2 | 72.1 | 8.5 | 89.4 | 11.2 |
|  |  | ±1.32 | ±2.67 | ±4.78 | ±3.66 | ±4.38 | ±4.07 | ±2.69 | ±5.45 | ±1.73 | ±6.68 | ±1.29 | ±8.11 |
| S-14-20 | 0.0 | 96.4 | 64.3 | 90.2 | 60.4 | 18.1 | 6.2 | 52.5 | 93.1 | 90.5 | 66.8 | 92.6 | 82.4 |
|  |  | ±2.74 | ±2.87 | ±2.60 | ±6.40 | ±5.53 | ±2.35 | ±2.31 | ±3.16 | ±3.04 | ±3.45 | ±3.35 | ±4.12 |
| S-15-20 | 0.0 | 86.8 | 66.7 | 83.8 | 74.0 | 20.0 | 11.0 | 56.1 | 82.6 | 68.1 | 15.8 | 86.1 | 80.4 |
|  |  | ±1.40 | ±6.38 | ±2.01 | ±2.99 | ±7.40 | ±4.29 | ±1.29 | ±0.86 | ±3.69 | ±4.81 | ±2.80 | ±4.26 |
| S-16-20 | 0.0 | 92.0 | 5.2 | 93.1 | 8.7 | 5.9 | 0.0 | 18.4 | 89.8 | 28.1 | 8.3 | 90.3 | 76.4 |
|  |  | ±2.21 | ±2.45 | ±2.51 | ±2.46 | ±3.15 |  | ±3.38 | ±2.16 | ±4.21 | ±1.12 | ±4.16 | ±2.35 |
| S-17-20 | 0.0 | 94.0 | 53.0 | 91.1 | 59.6 | 19.5 | 10.2 | 54.6 | 83.6 | 68.3 | 53.1 | 91.2 | 89.0 |
|  |  | ±2.17 | ±2.10 | ±2.15 | ±4.62 | ±4.70 | ±1.72 | ±2.88 | ±1.75 | ±3.27 | ±2.39 | ±3.23 | ±2.04 |
| S-18-20 | 3.7 | 100.0 | 80.4 | 100.0 | 72.2 | 30.6 | 16.0 | 63.8 | 100.0 | 100.0 | 79.0 | 100.0 | 100.0 |
|  | ±4.38 | ±0.0 | ±5.91 | ±0.0 | ±5.64 | ±5.96 | ±1.82 | ±2.23 | ±0.0 | ±0.0 | ±4.82 | ±0.0 | ±0.0 |
| S-19-20 | 0.0 | 93.0 | 57.0 | 92.3 | 63.6 | 18.8 | 10.8 | 34.7 | 91.5 | 69.0 | 7.6 | 91.0 | 88.7 |
|  |  | ±3.04 | ±3.83 | ±2.16 | ±2.43 | ±2.33 | ±5.31 | ±5.02 | ±1.38 | ±1.54 | ±1.88 | ±3.01 | ±2.62 |
| S-20-20 | 0.0 | 95.5 | 63.8 | 92.3 | 67.5 | 19.6 | 8.0 | 34.2 | 92.0 | 71.2 | 6.7 | 92.3 | 91.1 |
|  |  | ±1.87 | ±3.85 | ±2.16 | ±2.74 | ±2.54 | ±1.29 | ±6.56 | ±3.24 | ±5.37 | ±3.36 | ±2.16 | ±2.15 |
| S-21-20 | 0.0 | 97.0 | 61.3 | 91.3 | 60.6 | 20.1 | 11.0 | 35.0 | 92.6 | 73.4 | 7.4 | 92.1 | 89.0 |
|  |  | ±2.43 | ±2.98 | ±3.49 | ±2.47 | ±3.12 | ±5.24 | ±5.99 | ±1.57 | ±2.78 | ±3.51 | ±1.04 | ±2.04 |
| St.Paul-1-20 | 0.0 | 91.8 | 16.5 | 89.6 | 42.5 | 11.3 | 8.6 | 48.2 | 87.3 | 43.6 | 4.4 | 90.2 | 15.2 |
|  |  | ±1.59 | ±4.15 | ±1.59 | ±2.98 | ±2.62 | ±1.81 | ±1.29 | ±2.74 | ±3.24 | ±4.94 | ±0.94 | ±7.21 |
| St.Paul-2-20 | 0.0 | 89.6 | 28.2 | 83.4 | 27.9 | 10.4 | 8.0 | 39.9 | 83.2 | 67.5 | 4.4 | 79.5 | 4.4 |
|  |  | ±1.59 | ±4.58 | ±3.13 | ±4.50 | ±4.26 | ±2.21 | ±2.45 | ±4.82 | ±5.12 | ±4.94 | ±4.60 | ±4.94 |
| St.Paul-3-20 | 0.0 | 84.1 | 53.5 | 81.1 | 57.9 | 11.2 | 11.7 | 54.4 | 81.9 | 60.0 | 4.4 | 83.1 | 8.5 |
|  |  | ±5.70 | ±3.19 | ±2.93 | ±4.97 | ±3.91 | ±4.53 | ±2.68 | ±3.45 | ±2.54 | ±4.94 | ±2.59 | ±6.68 |
| St.Paul-4-20 | 0.0 | 100.0 | 57.0 | 100.0 | 84.5 | 9.8 | 8.9 | 45.8 | 100.0 | 100.0 | 4.8 | 100.0 | 4.6 |
|  |  | ±0.0 | ±3.36 | ±0.0 | ±6.97 | ±4.64 | ±3.49 | ±4.07 | ±0.0 | ±0.0 | ±5.41 | ±0.0 | ±5.23 |
| St.Paul-5-20 | 0.0 | 100.0 | 55.9 | 100.0 | 83.5 | 9.3 | 9.8 | 41.2 | 100.0 | 100.0 | 7.2 | 100.0 | 4.4 |
|  |  | ±0.0 | ±5.31 | ±0.0 | ±5.38 | ±5.31 | ±3.16 | ±3.77 | ±0.0 | ±0.0 | ±1.33 | ±0.0 | ±4.94 |
| St.Paul-6-20 | 0.0 | 94.0 | 66.1 | 94.0 | 66.5 | 15.5 | 9.8 | 55.4 | 94.0 | 78.1 | 4.4 | 93.2 | 27.0 |
|  |  | ±2.17 | ±5.33 | ±2.57 | ±4.48 | ±1.55 | ±3.16 | ±3.62 | ±2.32 | ±6.03 | ±4.94 | ±2.64 | ±7.55 |
| St.Paul-7-20 | 0.0 | 100.0 | 39.9 | 100.0 | 79.0 | 14.1 | 14.6 | 24.2 | 100.0 | 89.5 | 5.7 | 100.0 | 4.4 |
|  |  | ±0.0 | ±7.60 | ±0.0 | ±4.13 | ±4.51 | ±4.51 | ±4.09 | ±0.0 | ±5.64 | ±4.04 | ±0.0 | ±4.94 |
| St.Paul-8-20 | 0.8 | 87.8 | 55.4 | 88.9 | 59.8 | 12.7 | 14.6 | 55.4 | 86.6 | 67.5 | 7.8 | 89.4 | 8.0 |
|  | ±1.63 | ±4.07 | ±2.11 | ±5.05 | ±7.09 | ±4.67 | ±4.20 | ±2.11 | ±4.13 | ±5.25 | ±6.76 | ±3.63 | ±6.79 |
| St.Paul-9-20 | 0.0 | 93.8 | 26.6 | 93.9 | 53.8 | 11.5 | 12.5 | 31.8 | 93.0 | 81.8 | 4.4 | 94.6 | 0.0 |
|  |  | ±2.35 | ±4.96 | ±2.04 | ±0.87 | ±6.24 | ±2.87 | ±1.74 | ±3.20 | ±2.10 | ±4.94 | ±1.42 |  |
| St.Paul-10-20 | 0.0 | 100.0 | 28.1 | 88.8 | 31.7 | 9.7 | 9.8 | 23.9 | 90.4 | 52.9 | 2.1 | 90.3 | 6.6 |
|  |  | ±0.0 | ±2.81 | ±4.59 | ±1.80 | ±2.97 | ±4.77 | ±3.86 | ±1.17 | ±1.22 | ±4.08 | ±1.76 | ±4.34 |
| St.Paul-11-20 | 0.0 | 91.7 | 55.5 | 92.6 | 54.7 | 15.5 | 11.6 | 46.8 | 92.5 | 88.6 | 3.5 | 92.3 | 11.6 |
|  |  | ±1.12 | ±2.80 | ±1.57 | ±2.29 | ±2.53 | ±2.40 | ±3.27 | ±1.38 | ±4.10 | ±4.08 | ±2.92 | ±3.71 |
| V.river c.-1-20 | 0.0 | 93.2 | 65.5 | 90.1 | 82.4 | 21.3 | 11.2 | 51.8 | 92.3 | 83.7 | 12.7 | 92.5 | 12.8 |
|  |  | ±1.53 | ±4.95 | ±1.61 | ±3.61 | ±5.48 | ±4.33 | ±1.29 | ±1.19 | ±3.53 | ±5.52 | ±1.38 | ±4.75 |
| V.river c.-2-20 | 0.0 | 100.0 | 39.6 | 90.0 | 57.5 | 10.7 | 9.0 | 30.1 | 96.2 | 93.6 | 9.2 | 88.8 | 11.0 |
|  |  | ±0.0 | ±6.53 | ±6.05 | ±6.04 | ±2.74 | ±1.78 | ±9.18 | ±2.90 | ±2.46 | ±6.79 | ±2.09 | ±3.75 |
| T.hills c.-1-20 | 0.0 | 94.7 | 20.1 | 81.5 | 51.1 | 10.5 | 7.2 | 36.5 | 88.4 | 85.1 | 2.1 | 86.5 | 3.7 |
|  |  | ±2.84 | ±4.26 | ±5.94 | ±1.31 | ±4.38 | ±3.24 | ±8.05 | ±4.44 | ±3.79 | ±4.08 | ±3.40 | ±4.38 |
| Lamont c.-1-20 | 0.0 | 100.0 | 26.9 | 100.0 | 20.2 | 9.3 | 2.9 | 26.0 | 86.2 | 26.5 | 4.4 | 88.4 | 0.0 |
|  |  | ±0.0 | ±1.73 | ±0.0 | ±4.01 | ±5.76 | ±3.86 | ±6.88 | ±4.26 | ±4.53 | ±4.94 | ±3.71 |  |
| Lamont c.-2-20 | 0.0 | 100.0 | 80.8 | 100.0 | 84.2 | 12.3 | 13.3 | 62.4 | 100.0 | 100.0 | 55.7 | 100.0 | 100.0 |
|  |  | ±0.0 | ±4.81 | ±0.0 | ±2.99 | ±4.13 | ±3.29 | ±5.17 | ±0.0 | ±0.0 | ±3.93 | ±0.0 | ±0.0 |
| Lamont c.-3-20 | 0.0 | 100.0 | 52.5 | 100.0 | 83.5 | 9.0 | 5.1 | 31.8 | 100.0 | 84.9 | 5.9 | 100.0 | 8.9 |
|  |  | ±0.0 | ±0.62 | ±0.0 | ±5.95 | ±5.67 | ±2.40 | ±5.73 | ±0.0 | ±2.77 | ±2.00 | ±0.0 | ±6.71 |
| Lamont c.-4-20 | 0.0 | 100.0 | 63.9 | 100.0 | 80.2 | 11.7 | 13.6 | 54.4 | 100.0 | 79.4 | 54.9 | 100.0 | 100.0 |
|  |  | ±0.0 | ±5.44 | ±0.0 | ±4.95 | ±3.33 | ±6.10 | ±2.22 | ±0.0 | ±3.24 | ±1.62 | ±0.0 | ±0.0 |
| Lamont c.-5-20 | 0.0 | 100.0 | 37.7 | 88.5 | 53.3 | 12.0 | 11.7 | 47.7 | 91.0 | 100.0 | 6.9 | 90.9 | 17.2 |
|  |  | ±0.0 | ±3.55 | ±3.23 | ±1.65 | ±3.19 | ±3.68 | ±3.53 | ±2.72 | ±0.0 | ±4.53 | ±2.52 | ±5.40 |
| Lamont c.-6-20 | 0.0 | 89.5 | 56.0 | 88.1 | 60.1 | 14.2 | 18.4 | 58.8 | 87.7 | 77.0 | 6.9 | 84.7 | 10.0 |
|  |  | ±2.20 | ±1.80 | ±2.45 | ±3.28 | ±3.75 | ±3.38 | ±1.53 | ±3.38 | ±9.45 | ±4.53 | ±2.98 | ±4.51 |
| L.S.Anne c.-1-20 | 0.0 | 100.0 | 100.0 | 100.0 | 100.0 | 18.9 | 11.0 | 78.8 | 100.0 | 100.0 | 70.3 | 100.0 | 100.0 |
|  |  | ±0.0 | ±0.0 | ±0.0 | ±0.0 | ±1.89 | ±2.04 | ±2.98 | ±0.0 | ±0.0 | ±2.74 | ±0.0 | ±0.0 |
| L.S.Anne c.-2-20 | 0.0 | 100.0 | 79.5 | 100.0 | 81.6 | 21.4 | 8.9 | 59.4 | 100.0 | 97.9 | 46.3 | 100.0 | 100.0 |
|  |  | ±0.0 | ±1.99 | ±0.0 | ±3.40 | ±4.43 | ±3.67 | ±7.12 | ±0.0 | ±2.63 | ±2.63 | ±0.0 | ±0.0 |
| L.S.Anne c.-3-20 | 2.3 | 100.0 | 67.4 | 100.0 | 80.4 | 40.1 | 4.7 | 62.5 | 100.0 | 100.0 | 25.4 | 100.0 | 9.4 |
|  | ±4.45 | ±0.0 | ±2.86 | ±0.0 | ±2.10 | ±2.95 | ±1.90 | ±2.72 | ±0.0 | ±0.0 | ±5.39 | ±0.0 | ±4.82 |
| L.S.Anne c.-4-20 | 0.0 | 100.0 | 100.0 | 100.0 | 100.0 | 42.6 | 8.9 | 70.5 | 100.0 | 100.0 | 12.5 | 100.0 | 6.9 |
|  |  | ±0.0 | ±0.0 | ±0.0 | ±0.0 | ±3.81 | ±3.85 | ±1.49 | ±0.0 | ±0.0 | ±5.69 | ±0.0 | ±4.53 |
| L.S.Anne c.-5-20 | 0.0 | 100.0 | 100.0 | 100.0 | 100.0 | 37.1 | 8.7 | 47.8 | 100.0 | 100.0 | 54.5 | 100.0 | 82.5 |
|  |  | ±0.0 | ±0.0 | ±0.0 | ±0.0 | ±6.04 | ±3.49 | ±1.89 | ±0.0 | ±0.0 | ±2.98 | ±0.0 | ±6.03 |
| L.S.Anne c.-6-20 | 0.0 | 100.0 | 69.6 | 100.0 | 90.8 | 23.2 | 12.2 | 81.1 | 100.0 | 100.0 | 22.9 | 100.0 | 11.0 |
|  |  | ±0.0 | ±4.45 | ±0.0 | ±6.79 | ±8.24 | ±3.67 | ±5.68 | ±0.0 | ±0.0 | ±4.08 | ±0.0 | ±8.17 |
| L.S. c.Anne-7-20 | 0.0 | 100.0 | 77.5 | 100.0 | 88.0 | 15.8 | 7.6 | 60.8 | 100.0 | 100.0 | 77.7 | 100.0 | 100.0 |
|  |  | ±0.0 | ±1.25 | ±0.0 | ±3.60 | ±4.81 | ±1.74 | ±2.01 | ±0.0 | ±0.0 | ±3.24 | ±0.0 | ±0.0 |
| L.S. c.Anne-8-20 | 0.0 | 93.7 | 80.4 | 87.9 | 60.7 | 27.1 | 8.9 | 40.7 | 82.9 | 56.0 | 4.4 | 82.3 | 2.3 |
|  |  | ±2.32 | ±2.54 | ±3.62 | ±2.32 | ±5.65 | ±3.85 | ±3.85 | ±2.01 | ±3.13 | ±4.94 | ±2.65 | ±4.45 |
| D-1-20 | 0.0 | 100.0 | 91.2 | 100.0 | 75.3 | 37.1 | 6.8 | 58.1 | 100.0 | 81.1 | 84.8 | 100.0 | 100.0 |
|  |  | ±0.0 | ±4.41 | ±0.0 | ±2.86 | ±1.87 | ±1.05 | ±3.62 | ±0.0 | ±1.89 | ±2.67 | ±0.0 | ±0.0 |
| D-2-20 | 0.0 | 100.0 | 86.4 | 100.0 | 89.6 | 38.3 | 15.8 | 46.5 | 100.0 | 100.0 | 54.2 | 95.3 | 95.4 |
|  |  | ±0.0 | ±5.73 | ±0.0 | ±1.59 | ±4.04 | ±3.51 | ±2.29 | ±0.0 | ±0.0 | ±1.57 | ±1.91 | ±1.97 |
| C.C.-1-20 | 0.0 | 94.7 | 31.0 | 90.9 | 36.2 | 12.2 | 4.3 | 28.9 | 93.1 | 20.1 | 11.1 | 93.8 | 90.5 |
|  |  | ±1.68 | ±4.36 | ±0.67 | ±3.85 | ±3.14 | ±3.59 | ±3.69 | ±3.16 | ±3.07 | ±2.38 | ±3.44 | ±3.04 |
| C.C.-2-20 | 0.0 | 100.0 | 100.0 | 4.4 | 2.3 | 100.0 | 2.1 | 14.1 | 100.0 | 100.0 | 58.9 | 100.0 | 100.0 |
|  |  | ±0.0 | ±0.0 | ±4.94 | ±4.45 | ±0.0 | ±4.08 | ±1.84 | ±0.0 | ±0.0 | ±7.39 | ±0.0 | ±0.0 |
| C.C.-3-20 | 0.0 | 90.0 | 42.1 | 51.5 | 31.2 | 15.5 | 0.0 | 40.1 | 94.1 | 36.3 | 38.7 | 94.8 | 94.0 |
|  |  | ±3.13 | ±4.41 | ±2.10 | ±1.41 | ±2.71 |  | ±2.76 | ±2.18 | ±5.29 | ±2.54 | ±2.45 | ±2.57 |
| C.C.-4-20 | 0.0 | 100.0 | 100.0 | 0.0 | 11.3 | 100.0 | 2.1 | 11.8 | 100.0 | 100.0 | 66.1 | 100.0 | 100.0 |
|  |  | ±0.0 | ±0.0 |  | ±4.95 | ±0.0 | ±2.63 | ±3.54 | ±0.0 | ±0.0 | ±7.25 | ±0.0 | ±0.0 |
| C.C.-5-20 | 0.0 | 100.0 | 100.0 | 2.3 | 4.4 | 100.0 | 7.9 | 44.1 | 100.0 | 100.0 | 53.2 | 100.0 | 100.0 |
|  |  | ±0.0 | ±0.0 | ±4.45 | ±4.94 | ±0.0 | ±4.39 | ±5.43 | ±0.0 | ±0.0 | ±1.67 | ±0.0 | ±0.0 |
| C.C.-6-20 | 0.0 | 100.0 | 66.0 | 94.2 | 60.1 | 10.3 | 8.6 | 28.8 | 100.0 | 94.2 | 28.1 | 100.0 | 91.2 |
|  |  | ±0.0 | ±2.78 | ±2.01 | ±2.78 | ±4.55 | ±4.68 | ±7.07 | ±0.0 | ±2.01 | ±2.74 | ±0.0 | ±1.81 |
| C.C.-7-20 | 0.0 | 95.6 | 71.1 | 94.1 | 74.7 | 5.3 | 6.0 | 48.2 | 93.3 | 59.1 | 48.1 | 94.0 | 91.6 |
|  |  | ±3.55 | ±6.05 | ±2.18 | ±5.12 | ±1.57 | ±2.17 | ±1.29 | ±2.54 | ±3.64 | ±1.45 | ±2.17 | ±3.40 |
| B.L. c.-1-20 | 0.0 | 95.4 | 70.6 | 94.1 | 78.1 | 14.0 | 14.0 | 64.6 | 94.9 | 78.4 | 6.3 | 94.1 | 10.2 |
|  |  | ±3.62 | ±2.88 | ±2.18 | ±1.76 | ±5.52 | ±6.36 | ±4.08 | ±2.52 | ±3.33 | ±4.30 | ±2.33 | ±4.35 |
| B.L. c.-2-20 | 1.7 | 94.5 | 72.7 | 94.0 | 77.3 | 14.2 | 11.0 | 57.9 | 93.3 | 81.7 | 6.9 | 94.0 | 8.8 |
|  | ±3.27 | ±3.30 | ±2.17 | ±2.57 | ±5.07 | ±2.86 | ±5.76 | ±4.33 | ±3.01 | ±1.34 | ±4.53 | ±2.17 | ±1.81 |
| B.L. c.-3-20 | 0.0 | 94.5 | 76.5 | 97.9 | 79.8 | 11.3 | 12.8 | 57.2 | 94.8 | 81.8 | 5.2 | 95.6 | 8.1 |
|  |  | ±2.83 | ±7.33 | ±2.61 | ±4.22 | ±5.50 | ±2.19 | ±2.59 | ±2.81 | ±4.02 | ±4.21 | ±3.69 | ±6.74 |
| SK-1-20 | 0.0 | 100.0 | 0.0 | 100.0 | 2.3 | 12.5 | 0.0 | 13.2 | 100.0 | 15.2 | 12.7 | 100.0 | 8.9 |
|  |  | ±0.0 |  | ±0.0 | ±4.45 | ±2.87 |  | ±2.77 | ±0.0 | ±2.10 | ±3.24 | ±0.0 | ±4.23 |
| SK-2-20 | 4.4 | 100.0 | 71.5 | 100.0 | 91.5 | 21.3 | 9.3 | 55.2 | 100.0 | 84.1 | 5.8 | 100.0 | 6.0 |
|  | ±4.94 | ±0.0 | ±3.43 | ±0.0 | ±2.03 | ±5.37 | ±2.17 | ±3.64 | ±0.0 | ±2.57 | ±5.07 | ±0.0 | ±4.06 |
| SK-3-20 | 0.0 | 93.7 | 79.7 | 90.6 | 60.2 | 25.8 | 8.9 | 54.6 | 93.1 | 84.9 | 10.3 | 92.6 | 6.0 |
|  |  | ±2.32 | ±3.61 | ±3.65 | ±2.46 | ±5.86 | ±5.16 | ±1.28 | ±2.51 | ±2.12 | ±4.47 | ±1.55 | ±4.06 |
| SK-4-20 | 0.0 | 100.0 | 84.1 | 100.0 | 83.0 | 27.5 | 9.5 | 54.1 | 100.0 | 89.2 | 9.2 | 100.0 | 6.7 |
|  |  | ±0.0 | ±2.57 | ±0.0 | ±4.51 | ±3.74 | ±2.84 | ±2.57 | ±0.0 | ±3.85 | ±1.29 | ±0.0 | ±2.76 |
| SK-5-20 | 0.0 | 100.0 | 82.9 | 100.0 | 84.4 | 27.1 | 8.4 | 54.4 | 100.0 | 92.5 | 17.5 | 100.0 | 4.8 |
|  |  | ±0.0 | ±4.33 | ±0.0 | ±4.64 | ±4.21 | ±3.81 | ±1.13 | ±0.0 | ±1.38 | ±6.03 | ±0.0 | ±5.41 |
| SK-6-20 | 0.0 | 93.4 | 40.1 | 89.4 | 46.3 | 14.0 | 10.5 | 47.8 | 90.8 | 54.4 | 10.2 | 90.9 | 4.4 |
|  |  | ±2.67 | ±1.63 | ±1.29 | ±3.98 | ±6.80 | ±5.56 | ±1.89 | ±1.85 | ±2.68 | ±4.35 | ±2.24 | ±3.52 |
| SK-7-20 | 0.0 | 94.0 | 73.3 | 92.6 | 68.2 | 25.9 | 9.1 | 48.3 | 91.8 | 73.1 | 16.7 | 91.2 | 8.8 |
|  |  | ±2.17 | ±5.08 | ±3.35 | ±5.35 | ±1.87 | ±2.12 | ±2.10 | ±1.88 | ±7.11 | ±6.10 | ±1.81 | ±1.81 |
| SK-8-20 | 0.0 | 100.0 | 54.7 | 100.0 | 91.4 | 18.1 | 8.0 | 40.6 | 100.0 | 64.5 | 19.8 | 100.0 | 8.9 |
|  |  | ±0.0 | ±2.74 | ±0.0 | ±2.04 | ±2.98 | ±1.29 | ±1.68 | ±0.0 | ±7.08 | ±6.62 | ±0.0 | ±6.71 |
| SK-9-20 | 0.0 | 100.0 | 56.4 | 100.0 | 93.2 | 19.1 | 8.2 | 34.0 | 100.0 | 58.4 | 4.0 | 100.0 | 8.1 |
|  |  | ±0.0 | ±3.24 | ±0.0 | ±2.64 | ±5.73 | ±3.66 | ±2.97 | ±0.0 | ±2.67 | ±4.81 | ±0.0 | ±6.74 |
| SK-10-20 | 0.0 | 100.0 | 72.5 | 100.0 | 88.9 | 16.1 | 8.3 | 60.2 | 100.0 | 90.2 | 20.1 | 100.0 | 9.4 |
|  |  | ±0.0 | ±2.13 | ±0.0 | ±4.22 | ±4.12 | ±1.12 | ±5.00 | ±0.0 | ±3.16 | ±4.26 | ±0.0 | ±4.82 |
| SK-11-20 | 0.0 | 94.7 | 76.6 | 82.3 | 76.3 | 17.3 | 6.2 | 53.9 | 93.9 | 57.1 | 16.7 | 94.2 | 4.6 |
|  |  | ±2.84 | ±3.29 | ±6.2 | ±4.31 | ±4.09 | ±2.72 | ±1.35 | ±2.55 | ±2.46 | ±6.10 | ±2.13 | ±5.23 |
| SK-12-20 | 0.0 | 100.0 | 51.5 | 100.0 | 58.4 | 11.3 | 6.2 | 53.7 | 100.0 | 55.6 | 17.2 | 100.0 | 8.9 |
|  |  | ±0.0 | ±1.11 | ±0.0 | ±3.54 | ±0.99 | ±2.19 | ±3.11 | ±0.0 | ±2.38 | ±6.40 | ±0.0 | ±6.71 |
| SK-13-20 | 0.0 | 92.5 | 56.8 | 94.1 | 71.3 | 6.6 | 2.2 | 48.9 | 94.7 | 54.9 | 8.8 | 94.1 | 6.9 |
|  |  | ±1.38 | ±2.62 | ±3.15 | ±1.97 | ±2.59 | ±2.82 | ±1.32 | ±2.74 | ±2.48 | ±1.81 | ±2.18 | ±4.53 |
| MB-3-20 | 0.0 | 100.0 | 2.1 | 97.8 | 0.0 | 10.6 | 0.0 | 20.7 | 93.1 | 32.5 | 21.4 | 97.2 | 6.8 |
|  |  | ±0.0 | ±4.08 | ±2.67 |  | ±3.74 |  | ±6.67 | ±2.51 | ±6.39 | ±5.43 | ±2.23 | ±2.64 |

aEuropean Clubroot Differential (ECD) 02 = *Brassica rapa* ssp. *rapifera* line AAbbCC; ECD 05 = *B. rapa* var. *pekinensis* ‘Granaat’; ECD 06 = *Brassica napus* ‘Nevin’; ECD 08 = *B. napus* ‘Giant Rape’ selection; ECD 09 = *B. napus* New Zealand resistant rape; ECD 10 = *B. napus* var. *napobrassica* ‘Wilhemsburger’; ECD 11 = *Brassica oleracea* var. *capitata* ‘Badger Shipper’; ECD 13 = ‘Jersey Queen’; Brutor = *B. napus* ‘Brutor’; Laur. = *B. napus* var. *napobrassica* ‘Laurentian’; Westar = *B. napus* ‘Westar’; and 45H29 = *B. napus* ‘45H29’.

bThe mean index of disease (ID, %) ± standard error is shown for each host genotype/pathogen combination. A host was considered resistant if the mean ID was <50% and the 95% confidence interval (CI) did not overlap 50%.
